# Supplementary material for: Viscosity and Density of Narrow Distillation Cuts from Refined Petroleum- and Synthetic-Derived Distillates in the −60 to +60 °C Range
Source: PubMed Central journal article supplement — Energy Fuels. 2022 Oct 10;36(20):12563–79. doi: 10.1021/acs.energyfuels.2c02625 (PMC9590421; doi:10.1021/acs.energyfuels.2c02625), 2022-10-10
Supplement: ef2c02625_si_001.pdf [file ef2c02625_si_001.pdf]

## SUPPORTING INFORMATION

### **Viscosity and Density of Narrow Distillation Cuts from Refined Petroleum- and Synthetic-derived Distillates in -60 to +60 °C Range**

*Felix Link\*, Arno de Klerk*

Department of Chemical and Materials Engineering

University of Alberta

9211-116 Street NW, Edmonton, AB, Canada T6G 1H9

e-mail: [flink@ualberta.ca](mailto:flink@ualberta.ca)

## 1. Analysis of Petroleum-based Kerosene

The petroleum-based kerosene was analyzed via gas chromatography to ensure comparability of the material with jet fuel. Analyses were carried out using an Agilent D7890 chromatograph equipped with a HP-PONA column of 50 m length and an FID detector using He as carrier gas. The sample was diluted to 1 % in *n*-pentane (99% Fisher) before injection. The temperature program was as follows: (i) 8 min isothermal at 40 °C, (ii) 3 °C/min to 150 °C, (iii) 5 °C/min to 320 °C. Prior to the analysis, the retention times of *n*-alkanes were determined using a boiling point calibration standard (Agilent 5080-8716).

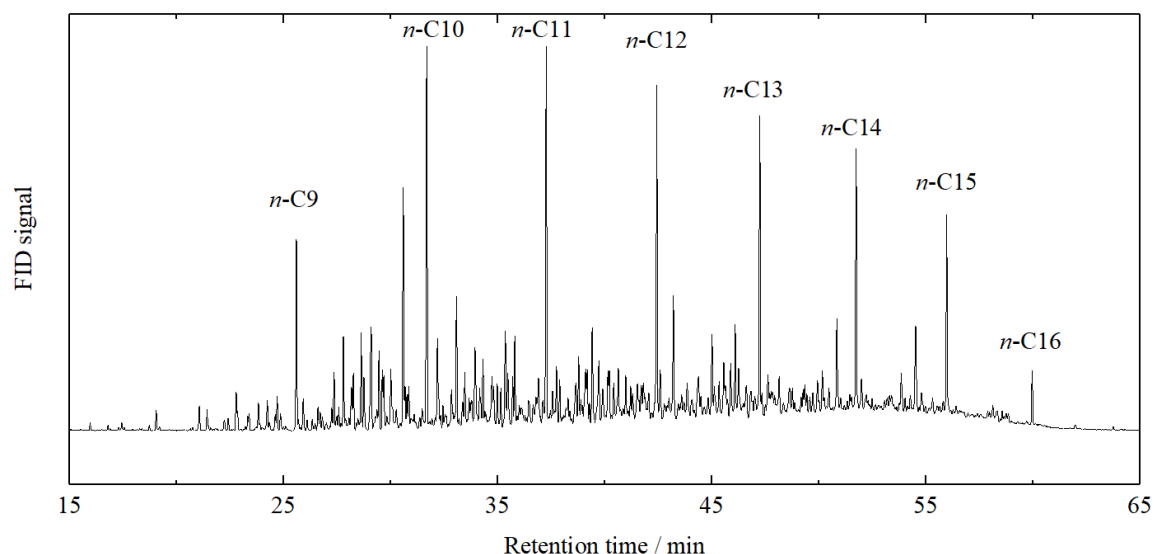

Figure S1 – Relevant portion of the gas chromatogram of the petroleum based kerosene.

Table S1 – Additional information on composition of petroleum kerosene.

|                    | Method        | Mass fraction<br>/ wt.-% |
|--------------------|---------------|--------------------------|
| C                  | CHNS analysis | 86.3                     |
| H                  | CHNS analysis | 13.8                     |
| N                  | CHNS analysis | < 0.2                    |
| S                  | CHNS analysis | < 0.2                    |
| Paraffins          | GCMS*         | 40                       |
| Monocycloparaffins | GCMS*         | 27                       |
| Dicycloparaffins   | GCMS*         | 10                       |
| Tricycloparaffins  | GCMS*         | 3                        |
| Total aromatics    | ASTM D6379    | 19                       |

\* analysis of the non-aromatic material separated via HPLC using a group method approach for MS analysis (see ASTM D2425 A2/A3). The boiling range of the sample was outside of the range recommended for ASTM D2425 and therefore the uncertainty of the results may be increased.

## 2. Composition of paraffin wax

The paraffin wax is the parent material of the synthetic distillate. The synthetic distillate is obtained from the paraffin wax via hydrocracking. The composition of the paraffin wax is discussed in detail in Ref. [1]. The composition obtained from high temperature GC analysis (see [1]) is repeated here for convenience.

Table S2 – Mass fraction of material as a function of the alkane chain length for the synthetic distillate. Data are based on Ref [1].

| Alkane carbon<br>number<br>$C_n$ | Mass<br>fraction<br>/ wt.% |
|----------------------------------|----------------------------|
| 20                               | 0.1                        |
| 21                               | 0.4                        |
| 22                               | 1.2                        |
| 23                               | 3.8                        |
| 24                               | 8.7                        |
| 25                               | 13.8                       |
| 26                               | 13.5                       |
| 27                               | 14.6                       |
| 28                               | 12.4                       |
| 29                               | 11.5                       |
| 30                               | 7.4                        |
| 31                               | 4.6                        |
| 32                               | 2.6                        |
| 33                               | 1.8                        |
| 34                               | 0.9                        |
| 35                               | 0.7                        |
| 36                               | 0.6                        |
| 37                               | 0.4                        |
| 38                               | 0.3                        |
| 39                               | 0.3                        |
| 40                               | 0.2                        |

### 3. Distillation

Table S3 - Mass recovered during the distillation of the petroleum-based kerosene. The mass added to the still was 563.2 g and hence losses amount to 8.2 g.

| Initial boiling point / °C | Final boiling point / °C | Mass recovered / g | Mass fraction / wt.-% |
|----------------------------|--------------------------|--------------------|-----------------------|
| >140                       | 140                      | 33.1               | 6.0                   |
| 140                        | 145                      | 12.0               | 2.2                   |
| 145                        | 150                      | 10.2               | 1.8                   |
| 150                        | 155                      | 20.6               | 3.7                   |
| 155                        | 160                      | 23.8               | 4.3                   |
| 160                        | 165                      | 19.3               | 3.5                   |
| 165                        | 170                      | 20.6               | 3.7                   |
| 170                        | 175                      | 24.0               | 4.3                   |
| 175                        | 180                      | 23.8               | 4.3                   |
| 180                        | 185                      | 22.0               | 4.0                   |
| 185                        | 190                      | 17.1               | 3.1                   |
| 190                        | 195                      | 23.1               | 4.2                   |
| 195                        | 200                      | 24.2               | 4.4                   |
| 200                        | 205                      | 19.9               | 3.6                   |
| 205                        | 210                      | 25.3               | 4.6                   |
| 210                        | 215                      | 22.3               | 4.0                   |
| 215                        | 220                      | 24.2               | 4.4                   |
| 220                        | 225                      | 19.7               | 3.5                   |
| 225                        | 230                      | 23.1               | 4.2                   |
| 230                        | 235                      | 19.3               | 3.5                   |
| 235                        | 240                      | 21.4               | 3.9                   |
| 240                        | 245                      | 18.4               | 3.3                   |
| 245                        | 250                      | 23.7               | 4.3                   |
| 250                        | 255                      | 18.7               | 3.4                   |
| >255                       |                          | 45.2               | 8.1                   |
| Sum                        |                          | 555.0              | 100.0                 |

Table S4 – Mass fraction of distillation cuts obtained from distillation of the hydrocracking product with boiling point  $\leq 260$  °C (synthetic distillate). Hydrocracking conditions and further details are given in [1]. It is pointed out here that the boiling point distribution below is the hydrocracking product. The blending of a jet fuel would be carried out using only the heavy naphtha/kerosene fraction of the material. The table is reprinted from [1]. Copyright 2021 American Chemical Society.

| Initial boiling point<br>/ °C | Final boiling point<br>/ °C | Mass fraction<br>/wt.-% |
|-------------------------------|-----------------------------|-------------------------|
| >140                          | 140                         | 2.0                     |
| 140                           | 145                         | 0.3                     |
| 145                           | 150                         | 0.3                     |
| 150                           | 155                         | 0.3                     |
| 155                           | 160                         | 0.3                     |
| 160                           | 165                         | 0.3                     |
| 165                           | 170                         | 0.3                     |
| 170                           | 175                         | 0.4                     |
| 175                           | 180                         | 0.4                     |
| 180                           | 185                         | 0.4                     |
| 185                           | 190                         | 0.4                     |
| 190                           | 195                         | 0.4                     |
| 195                           | 200                         | 0.5                     |
| 200                           | 205                         | 0.4                     |
| 205                           | 210                         | 0.5                     |
| 210                           | 215                         | 0.5                     |
| 215                           | 220                         | 0.5                     |
| 220                           | 225                         | 0.5                     |
| 225                           | 230                         | 0.5                     |
| 230                           | 235                         | 0.5                     |
| 235                           | 240                         | 0.5                     |
| 240                           | 245                         | 0.6                     |
| 245                           | 250                         | 0.6                     |
| 250                           | 255                         | 0.7                     |
| 255                           | 260                         | 0.8                     |
| 260                           | -                           | 87.0                    |

#### 4. Refractive Index of Distillation Fractions

In addition to the analyzed refractive indices presented in Tables S2-S3, the molar refractivity and average molar mass were calculated and are presented along with the refractive indices.

The molar refractivity for all distillation cuts was calculated according to Lorentz–Lorenz, Equation S1, to facilitate direct comparison with the more extensive data in literature [2][3]. The average molar mass was estimated from density and boiling point according to Equation S2 [4].

$$R_M = \frac{n^2 - 1}{n^2 + 2} \cdot \frac{M}{\rho} \quad (\text{S1})$$

$$M = 42.965 \cdot \exp(2.097 \cdot 10^{-4} \cdot T_b - 7.78712 \cdot SG + 2.08476 \cdot 10^{-3} \cdot T_b \cdot SG) \cdot T_b^{1.26007} \cdot SG^{4.98308} \quad (\text{S2})$$

$R_M$  ... molar refractivity ( $\text{cm}^3 \text{mol}^{-1}$ )

$M$  ... average molar mass ( $\text{g mol}^{-1}$ )

$\rho$  ... density at temperature  $T$  ( $\text{g cm}^{-3}$ )

$n$  ... refractive index at temperature  $T$

$T_b$  ... normal boiling point (K), estimated as average between initial and final boiling point.

$SG$  ... specific gravity (density relative to the density of water at 15.6 °C).

The selection and use of these correlations were to obtain derived data on the same basis for comparison and there is no implicit claim that these correlations are superior to others.

Table S5 - Refractive index for distillation cuts of petroleum-based kerosene. The final boiling point is 5 °C above the initial boiling point.

| Initial boiling point / °C | Refractive index at 20 °C ( $n_D^{20}$ ) | Refractive index at 25 °C ( $n_D^{25}$ ) | Refractive index at 40 °C ( $n_D^{40}$ ) | Refractive index at 60 °C ( $n_D^{60}$ ) | Slope of refractive index vs. temperature / ( $10^{-4} \text{ °C}^{-1}$ ) | Estimated average molar mass / ( $\text{g mol}^{-1}$ ) | Molar refractivity (Lorentz-Lorenz) / ( $\text{cm}^3 \text{ mol}^{-1}$ ) |
|----------------------------|------------------------------------------|------------------------------------------|------------------------------------------|------------------------------------------|---------------------------------------------------------------------------|--------------------------------------------------------|--------------------------------------------------------------------------|
| 140                        | 1.4311                                   | 1.4286                                   | 1.4215                                   | 1.4118                                   | -4.803                                                                    | 123                                                    | 41.4                                                                     |
| 145                        | 1.4323                                   | 1.4299                                   | 1.4227                                   | 1.4132                                   | -4.770                                                                    | 126                                                    | 42.3                                                                     |
| 150                        | 1.4341                                   | 1.4317                                   | 1.4248                                   | 1.4153                                   | -4.689                                                                    | 129                                                    | 43.2                                                                     |
| 155                        | 1.4375                                   | 1.4351                                   | 1.4281                                   | 1.4187                                   | -4.686                                                                    | 131                                                    | 44.1                                                                     |
| 160                        | 1.4407                                   | 1.4383                                   | 1.4313                                   | 1.4219                                   | -4.686                                                                    | 134                                                    | 45.0                                                                     |
| 165                        | 1.4427                                   | 1.4404                                   | 1.4334                                   | 1.4243                                   | -4.597                                                                    | 137                                                    | 45.9                                                                     |
| 170                        | 1.4437                                   | 1.4414                                   | 1.4345                                   | 1.4253                                   | -4.600                                                                    | 140                                                    | 46.8                                                                     |
| 175                        | 1.4444                                   | 1.4421                                   | 1.4353                                   | 1.4262                                   | -4.543                                                                    | 143                                                    | 47.8                                                                     |
| 180                        | 1.4461                                   | 1.4438                                   | 1.4370                                   | 1.4281                                   | -4.484                                                                    | 146                                                    | 48.8                                                                     |
| 185                        | 1.4480                                   | 1.4457                                   | 1.4389                                   | 1.4299                                   | -4.514                                                                    | 149                                                    | 49.8                                                                     |
| 190                        | 1.4498                                   | 1.4476                                   | 1.4409                                   | 1.4321                                   | -4.427                                                                    | 152                                                    | 50.7                                                                     |
| 195                        | 1.4518                                   | 1.4496                                   | 1.4429                                   | 1.4341                                   | -4.427                                                                    | 155                                                    | 51.7                                                                     |
| 200                        | 1.4538                                   | 1.4516                                   | 1.4449                                   | 1.4362                                   | -4.397                                                                    | 159                                                    | 52.7                                                                     |
| 205                        | 1.4557                                   | 1.4535                                   | 1.4470                                   | 1.4383                                   | -4.343                                                                    | 162                                                    | 53.5                                                                     |
| 210                        | 1.4564                                   | 1.4542                                   | 1.4477                                   | 1.4390                                   | -4.343                                                                    | 165                                                    | 54.6                                                                     |
| 215                        | 1.4561                                   | 1.4539                                   | 1.4474                                   | 1.4388                                   | -4.314                                                                    | 169                                                    | 55.9                                                                     |
| 220                        | 1.4566                                   | 1.4544                                   | 1.4479                                   | 1.4393                                   | -4.314                                                                    | 173                                                    | 57.1                                                                     |
| 225                        | 1.4581                                   | 1.4559                                   | 1.4495                                   | 1.4410                                   | -4.257                                                                    | 176                                                    | 58.2                                                                     |
| 230                        | 1.4594                                   | 1.4572                                   | 1.4509                                   | 1.4424                                   | -4.230                                                                    | 180                                                    | 59.4                                                                     |
| 235                        | 1.4600                                   | 1.4579                                   | 1.4515                                   | 1.4431                                   | -4.227                                                                    | 184                                                    | 60.6                                                                     |
| 240                        | 1.4613                                   | 1.4592                                   | 1.4529                                   | 1.4445                                   | -4.200                                                                    | 187                                                    | 61.8                                                                     |
| 245                        | 1.4625                                   | 1.4604                                   | 1.4541                                   | 1.4458                                   | -4.170                                                                    | 191                                                    | 63.2                                                                     |
| 250                        | 1.4628                                   | 1.4608                                   | 1.4545                                   | 1.4465                                   | -4.081                                                                    | 195                                                    | 64.4                                                                     |

Table S6 - Refractive index for distillation cuts of synthetic distillate. The final boiling point is 5 °C above the initial boiling point.

| Initial boiling point / °C | Refractive index at 20 °C ( $n_D^{20}$ ) | Refractive index at 25 °C ( $n_D^{25}$ ) | Refractive index at 40 °C ( $n_D^{40}$ ) | Refractive index at 60 °C ( $n_D^{60}$ ) | Slope of refractive index vs. temperature / ( $10^{-4} \text{ } ^\circ\text{C}^{-1}$ ) | Estimated average molar mass / ( $\text{g mol}^{-1}$ ) | Molar refractivity (Lorentz-Lorenz)/ ( $\text{cm}^3 \text{ mol}^{-1}$ ) |
|----------------------------|------------------------------------------|------------------------------------------|------------------------------------------|------------------------------------------|----------------------------------------------------------------------------------------|--------------------------------------------------------|-------------------------------------------------------------------------|
| 140                        | 1.4122                                   | 1.4099                                   | 1.4028                                   | 1.3933                                   | -4.743                                                                                 | 124                                                    | 42.1                                                                    |
| 145                        | 1.4129                                   | 1.4106                                   | 1.4035                                   | 1.3941                                   | -4.714                                                                                 | 127                                                    | 43.2                                                                    |
| 150                        | 1.4141                                   | 1.4118                                   | 1.4048                                   | 1.3954                                   | -4.686                                                                                 | 130                                                    | 44.2                                                                    |
| 155                        | 1.2482                                   | 1.4138                                   | 1.4068                                   | 1.3975                                   | -4.657                                                                                 | 133                                                    | 45.2                                                                    |
| 160                        | 1.4176                                   | 1.4154                                   | 1.4084                                   | 1.3992                                   | -4.627                                                                                 | 136                                                    | 46.2                                                                    |
| 165                        | 1.4187                                   | 1.4165                                   | 1.4095                                   | 1.4003                                   | -4.627                                                                                 | 140                                                    | 47.2                                                                    |
| 170                        | 1.4203                                   | 1.4181                                   | 1.4112                                   | 1.4021                                   | -4.570                                                                                 | 143                                                    | 48.2                                                                    |
| 175                        | 1.4228                                   | 1.4206                                   | 1.4139                                   | 1.4048                                   | -4.516                                                                                 | 146                                                    | 49.2                                                                    |
| 180                        | 1.4240                                   | 1.4218                                   | 1.4151                                   | 1.4061                                   | -4.486                                                                                 | 149                                                    | 50.3                                                                    |
| 185                        | 1.4254                                   | 1.4232                                   | 1.4165                                   | 1.4075                                   | -4.486                                                                                 | 152                                                    | 51.4                                                                    |
| 190                        | 1.4267                                   | 1.4245                                   | 1.4178                                   | 1.4089                                   | -4.457                                                                                 | 156                                                    | 52.5                                                                    |
| 195                        | 1.4279                                   | 1.4257                                   | 1.4191                                   | 1.4102                                   | -4.430                                                                                 | 159                                                    | 53.6                                                                    |
| 200                        | 1.4292                                   | 1.4271                                   | 1.4205                                   | 1.4118                                   | -4.370                                                                                 | 163                                                    | 54.8                                                                    |
| 205                        | 1.4309                                   | 1.4288                                   | 1.4222                                   | 1.4135                                   | -4.370                                                                                 | 166                                                    | 55.8                                                                    |
| 210                        | 1.4315                                   | 1.4294                                   | 1.4228                                   | 1.4141                                   | -4.370                                                                                 | 170                                                    | 57.1                                                                    |
| 215                        | 1.4321                                   | 1.4300                                   | 1.4234                                   | 1.4147                                   | -4.370                                                                                 | 174                                                    | 58.4                                                                    |
| 220                        | 1.4328                                   | 1.4307                                   | 1.4242                                   | 1.4156                                   | -4.314                                                                                 | 177                                                    | 59.6                                                                    |
| 225                        | 1.4335                                   | 1.4314                                   | 1.4249                                   | 1.4163                                   | -4.314                                                                                 | 181                                                    | 60.9                                                                    |
| 230                        | 1.4340                                   | 1.4319                                   | 1.4255                                   | 1.4169                                   | -4.286                                                                                 | 185                                                    | 62.3                                                                    |
| 235                        | 1.4344                                   | 1.4323                                   | 1.4259                                   | 1.4173                                   | -4.286                                                                                 | 189                                                    | 63.6                                                                    |
| 240                        | 1.4348                                   | 1.4328                                   | 1.4264                                   | 1.4180                                   | -4.227                                                                                 | 193                                                    | 64.9                                                                    |
| 245                        | 1.4354                                   | 1.4334                                   | 1.4270                                   | 1.4186                                   | -4.227                                                                                 | 197                                                    | 66.3                                                                    |
| 250                        | 1.4360                                   | 1.4340                                   | 1.4277                                   | 1.4194                                   | -4.170                                                                                 | 201                                                    | 67.7                                                                    |
| 255                        | 1.4368                                   | 1.4348                                   | 1.4285                                   | 1.4202                                   | -4.170                                                                                 | 206                                                    | 69.0                                                                    |
| 260                        | 1.4375                                   | 1.4355                                   | 1.4293                                   | 1.4210                                   | -4.143                                                                                 | 210                                                    | 70.5                                                                    |
| 265                        | 1.4384                                   | 1.4364                                   | 1.4302                                   | 1.4219                                   | -4.143                                                                                 | 214                                                    | 71.9                                                                    |
| 270                        | 1.4393                                   | 1.4373                                   | 1.4311                                   | 1.4229                                   | -4.114                                                                                 | 219                                                    | 73.3                                                                    |
| 275                        | 1.4403                                   | 1.4383                                   | 1.4321                                   | 1.4238                                   | -4.143                                                                                 | 223                                                    | 74.8                                                                    |
| 280                        | 1.4413                                   | 1.4393                                   | 1.4331                                   | 1.4249                                   | -4.114                                                                                 | 228                                                    | 76.3                                                                    |
| 285                        | 1.4422                                   | 1.4402                                   | 1.4339                                   | 1.4257                                   | -4.141                                                                                 | 232                                                    | 77.8                                                                    |
| 290                        | 1.4431                                   | 1.4411                                   | 1.4350                                   | 1.4269                                   | -4.057                                                                                 | 237                                                    | 79.4                                                                    |
| 295                        | 1.4440                                   | 1.4420                                   | 1.4358                                   | 1.4277                                   | -4.084                                                                                 | 242                                                    | 81.0                                                                    |
| 300                        | 1.4445                                   | 1.4426                                   | 1.4365                                   | 1.4285                                   | -4.027                                                                                 | 247                                                    | 82.6                                                                    |
| 305                        | 1.4451                                   | 1.4431                                   | 1.4370                                   | 1.4289                                   | -4.057                                                                                 | 252                                                    | 84.2                                                                    |
| 310                        | 1.4456                                   | 1.4437                                   | 1.4376                                   | 1.4296                                   | -4.027                                                                                 | 257                                                    | 85.9                                                                    |
| 315                        | 1.4464                                   | 1.4444                                   | 1.4384                                   | 1.4304                                   | -4.000                                                                                 | 262                                                    | 87.6                                                                    |
| 320                        | 1.4470                                   | 1.4451                                   | 1.4391                                   | 1.4312                                   | -3.970                                                                                 | 267                                                    | 89.2                                                                    |



### 3. Density and Viscosity of Distillation Fractions

The results of density and viscosity analysis of the distillation cuts from the petroleum-derived kerosene are summarized in Table S7. Similar data for the synthetic distillate cuts is shown in Table S8.

Abbreviations:

IBP-initial boiling point

FBP: final boiling point

Table S7 – Viscosity, density, shear rate and shear stress determined at different temperatures for narrow boiling range distillation cuts of petroleum kerosene. The data is the raw data collected from the instrument and not rounded.

| IBP<br>°C | FBP<br>°C | Cell<br>Temp.<br>°C | Dyn.<br>Visc.<br>mPa s | Kin. Visc.<br>mm <sup>2</sup> s <sup>-1</sup> | Shear<br>Rate<br>s <sup>-1</sup> | Shear<br>Stress<br>Pa | Density<br>g cm <sup>-3</sup> |
|-----------|-----------|---------------------|------------------------|-----------------------------------------------|----------------------------------|-----------------------|-------------------------------|
| 140       | 145       | 39.999              | 0.5587                 | 0.7464                                        | 1030                             | 0.563                 | 0.74852                       |
| 140       | 145       | 30.000              | 0.6450                 | 0.8520                                        | 1023                             | 0.660                 | 0.75706                       |
| 140       | 145       | 24.999              | 0.6871                 | 0.9031                                        | 1020                             | 0.701                 | 0.76089                       |
| 140       | 145       | 19.999              | 0.7368                 | 0.9637                                        | 1017                             | 0.749                 | 0.76460                       |
| 140       | 145       | 14.999              | 0.7909                 | 1.0289                                        | 1014                             | 0.802                 | 0.76869                       |
| 140       | 145       | 9.999               | 0.8501                 | 1.1003                                        | 1010                             | 0.859                 | 0.77262                       |
| 140       | 145       | -0.002              | 0.9964                 | 1.2770                                        | 1001                             | 0.997                 | 0.78023                       |
| 140       | 145       | -5.001              | 1.1214                 | 1.4301                                        | 996.0                            | 1.117                 | 0.78417                       |
| 140       | 145       | -10.001             | 1.2351                 | 1.5674                                        | 990.0                            | 1.223                 | 0.78802                       |
| 140       | 145       | -15.001             | 1.3630                 | 1.7211                                        | 983.3                            | 1.340                 | 0.79191                       |
| 140       | 145       | -20.001             | 1.5029                 | 1.8885                                        | 976.5                            | 1.468                 | 0.79581                       |
| 140       | 145       | -25.000             | 1.6774                 | 2.0977                                        | 967.7                            | 1.623                 | 0.79964                       |
| 140       | 145       | -30.001             | 1.8882                 | 2.3500                                        | 957.3                            | 1.808                 | 0.80351                       |
| 140       | 145       | -35.000             | 2.1170                 | 2.6219                                        | 946.6                            | 2.004                 | 0.80742                       |
| 140       | 145       | -40.001             | 2.4038                 | 2.9632                                        | 933.2                            | 2.243                 | 0.81119                       |
| 140       | 145       | -45.001             | 2.7575                 | 3.3830                                        | 917.2                            | 2.529                 | 0.81508                       |
| 140       | 145       | -50.001             | 3.1912                 | 3.8962                                        | 898.2                            | 2.866                 | 0.81907                       |
| 140       | 145       | -55.000             | 3.7326                 | 4.5357                                        | 875.7                            | 3.269                 | 0.82295                       |
| 140       | 145       | -59.157             | 4.4537                 | 5.3867                                        | 847.2                            | 3.773                 | 0.82679                       |
| 145       | 150       | 40.000              | 0.5566                 | 0.7362                                        | 1029                             | 0.573                 | 0.75596                       |
| 145       | 150       | 30.000              | 0.6368                 | 0.8333                                        | 1024                             | 0.652                 | 0.76422                       |
| 145       | 150       | 24.999              | 0.6824                 | 0.8884                                        | 1021                             | 0.696                 | 0.76813                       |
| 145       | 150       | 20.000              | 0.7336                 | 0.9502                                        | 1017                             | 0.746                 | 0.77205                       |
| 145       | 150       | 15.000              | 0.7884                 | 1.0160                                        | 1014                             | 0.799                 | 0.77600                       |
| 145       | 150       | 9.999               | 0.8521                 | 1.0925                                        | 1010                             | 0.860                 | 0.77993                       |
| 145       | 150       | -0.001              | 0.9969                 | 1.2654                                        | 1001                             | 0.997                 | 0.78776                       |
| 145       | 150       | -5.001              | 1.1014                 | 1.3914                                        | 997.4                            | 1.099                 | 0.79156                       |
| 145       | 150       | -10.002             | 1.2101                 | 1.5212                                        | 991.6                            | 1.200                 | 0.79550                       |
| 145       | 150       | -15.000             | 1.3403                 | 1.6768                                        | 984.8                            | 1.320                 | 0.79934                       |
| 145       | 150       | -20.001             | 1.4913                 | 1.8567                                        | 977.1                            | 1.457                 | 0.80322                       |
| 145       | 150       | -25.001             | 1.6672                 | 2.0656                                        | 968.3                            | 1.614                 | 0.80711                       |
| 145       | 150       | -29.999             | 1.8732                 | 2.3098                                        | 958.1                            | 1.795                 | 0.81101                       |
| 145       | 150       | -35.001             | 2.1199                 | 2.6014                                        | 946.3                            | 2.006                 | 0.81490                       |
| 145       | 150       | -40.000             | 2.4173                 | 2.9522                                        | 932.3                            | 2.254                 | 0.81879                       |
| 145       | 150       | -45.001             | 2.7815                 | 3.3810                                        | 915.8                            | 2.547                 | 0.82268                       |
| 145       | 150       | -50.000             | 3.2341                 | 3.9127                                        | 896.0                            | 2.898                 | 0.82657                       |

| IBP | FBP | Cell Temp. | Dyn. Visc. | Kin. Visc.                      | Shear Rate      | Shear Stress | Density            |
|-----|-----|------------|------------|---------------------------------|-----------------|--------------|--------------------|
| °C  | °C  | °C         | mPa s      | mm <sup>2</sup> s <sup>-1</sup> | s <sup>-1</sup> | Pa           | g cm <sup>-3</sup> |
| 145 | 150 | -55.001    | 3.8027     | 4.5795                          | 872.3           | 3.317        | 0.83038            |
| 145 | 150 | -59.999    | 4.5302     | 5.4300                          | 843.8           | 3.823        | 0.83429            |
| 150 | 155 | 40.003     | 0.5821     | 0.7660                          | 1026            | 0.597        | 0.75991            |
| 150 | 155 | 30.000     | 0.6589     | 0.8577                          | 1021            | 0.673        | 0.76823            |
| 150 | 155 | 25.000     | 0.7062     | 0.9147                          | 1018            | 0.719        | 0.77208            |
| 150 | 155 | 20.001     | 0.7563     | 0.9746                          | 1015            | 0.768        | 0.77600            |
| 150 | 155 | 15.000     | 0.8139     | 1.0436                          | 1011            | 0.823        | 0.77992            |
| 150 | 155 | 9.999      | 0.8820     | 1.1253                          | 1007            | 0.888        | 0.78377            |
| 150 | 155 | -0.002     | 1.0354     | 1.3080                          | 997.4           | 1.033        | 0.79162            |
| 150 | 155 | -5.000     | 1.1722     | 1.4736                          | 991.6           | 1.162        | 0.79547            |
| 150 | 155 | -10.001    | 1.2938     | 1.6186                          | 985.2           | 1.275        | 0.79933            |
| 150 | 155 | -15.000    | 1.4349     | 1.7865                          | 977.8           | 1.403        | 0.80316            |
| 150 | 155 | -20.001    | 1.5974     | 1.9795                          | 969.6           | 1.549        | 0.80698            |
| 150 | 155 | -25.001    | 1.7889     | 2.2062                          | 960.0           | 1.717        | 0.81083            |
| 150 | 155 | -30.001    | 2.0173     | 2.4762                          | 948.8           | 1.914        | 0.81470            |
| 150 | 155 | -35.001    | 2.2912     | 2.7990                          | 935.7           | 2.144        | 0.81860            |
| 150 | 155 | -40.001    | 2.6243     | 3.1907                          | 920.3           | 2.415        | 0.82246            |
| 150 | 155 | -45.002    | 3.0372     | 3.6755                          | 901.8           | 2.739        | 0.82633            |
| 150 | 155 | -50.002    | 3.5546     | 4.2816                          | 879.6           | 3.127        | 0.83021            |
| 150 | 155 | -55.001    | 4.2124     | 5.0509                          | 853.0           | 3.593        | 0.83400            |
| 150 | 155 | -60.004    | 5.0647     | 6.0445                          | 820.8           | 4.157        | 0.83789            |
| 155 | 160 | 40.001     | 0.6357     | 0.8296                          | 1021            | 0.649        | 0.76622            |
| 155 | 160 | 30.000     | 0.7220     | 0.9323                          | 1015            | 0.733        | 0.77446            |
| 155 | 160 | 24.999     | 0.7697     | 0.9890                          | 1012            | 0.779        | 0.77826            |
| 155 | 160 | 20.000     | 0.8248     | 1.0546                          | 1009            | 0.832        | 0.78214            |
| 155 | 160 | 14.999     | 0.8878     | 1.1294                          | 1005            | 0.892        | 0.78603            |
| 155 | 160 | 9.999      | 0.9586     | 1.2136                          | 1000            | 0.959        | 0.78992            |
| 155 | 160 | -0.002     | 1.1294     | 1.4158                          | 989.7           | 1.118        | 0.79766            |
| 155 | 160 | -5.001     | 1.2761     | 1.5922                          | 983.5           | 1.255        | 0.80148            |
| 155 | 160 | -10.002    | 1.4101     | 1.7510                          | 976.4           | 1.377        | 0.80532            |
| 155 | 160 | -15.001    | 1.5660     | 1.9354                          | 968.3           | 1.516        | 0.80912            |
| 155 | 160 | -20.002    | 1.7487     | 2.1511                          | 959.1           | 1.677        | 0.81293            |
| 155 | 160 | -25.001    | 1.9830     | 2.4282                          | 947.1           | 1.878        | 0.81666            |
| 155 | 160 | -30.001    | 2.2440     | 2.7349                          | 934.5           | 2.097        | 0.82051            |
| 155 | 160 | -35.001    | 2.5591     | 3.1044                          | 919.7           | 2.354        | 0.82436            |
| 155 | 160 | -40.000    | 2.9580     | 3.5716                          | 902.4           | 2.669        | 0.82821            |
| 155 | 160 | -45.001    | 3.4199     | 4.1102                          | 881.6           | 3.015        | 0.83206            |
| 155 | 160 | -50.002    | 4.0239     | 4.8138                          | 856.6           | 3.447        | 0.83591            |
| 155 | 160 | -55.001    | 4.8053     | 5.7223                          | 826.4           | 3.971        | 0.83975            |
| 155 | 160 | -60.000    | 5.8363     | 6.9187                          | 789.7           | 4.609        | 0.84355            |
| 160 | 165 | 40.000     | 0.6351     | 0.8234                          | 1021            | 0.648        | 0.77137            |
| 160 | 165 | 29.998     | 0.7271     | 0.9328                          | 1014            | 0.738        | 0.77953            |
| 160 | 165 | 25.000     | 0.7838     | 1.0006                          | 1011            | 0.792        | 0.78331            |
| 160 | 165 | 19.999     | 0.8462     | 1.0750                          | 1006            | 0.852        | 0.78716            |
| 160 | 165 | 14.998     | 0.9161     | 1.1582                          | 1002            | 0.918        | 0.79102            |
| 160 | 165 | 10.000     | 0.9939     | 1.2504                          | 997.0           | 0.991        | 0.79488            |
| 160 | 165 | -0.001     | 1.1720     | 1.4604                          | 986.2           | 1.156        | 0.80254            |

| IBP | FBP | Cell    | Dyn.   | Kin. Visc.                      | Shear           | Shear  | Density            |
|-----|-----|---------|--------|---------------------------------|-----------------|--------|--------------------|
| °C  | °C  | Temp.   | Visc.  |                                 | Rate            | Stress |                    |
|     |     | °C      | mPa s  | mm <sup>2</sup> s <sup>-1</sup> | s <sup>-1</sup> | Pa     | g cm <sup>-3</sup> |
| 160 | 165 | -5.001  | 1.3327 | 1.6527                          | 979.0           | 1.305  | 0.80638            |
| 160 | 165 | -10.001 | 1.4821 | 1.8293                          | 971.1           | 1.439  | 0.81021            |
| 160 | 165 | -15.002 | 1.6702 | 2.0519                          | 960.9           | 1.605  | 0.81400            |
| 160 | 165 | -20.000 | 1.8697 | 2.2863                          | 950.9           | 1.778  | 0.81779            |
| 160 | 165 | -25.001 | 2.1082 | 2.5660                          | 939.0           | 1.980  | 0.82160            |
| 160 | 165 | -30.001 | 2.3972 | 2.9042                          | 925.1           | 2.218  | 0.82543            |
| 160 | 165 | -35.000 | 2.7509 | 3.3173                          | 908.6           | 2.500  | 0.82926            |
| 160 | 165 | -40.001 | 3.2066 | 3.8491                          | 888.9           | 2.850  | 0.83310            |
| 160 | 165 | -45.001 | 3.7416 | 4.4706                          | 865.3           | 3.238  | 0.83694            |
| 160 | 165 | -50.001 | 4.4482 | 5.2906                          | 836.9           | 3.723  | 0.84078            |
| 160 | 165 | -55.001 | 5.3706 | 6.3587                          | 802.6           | 4.310  | 0.84462            |
| 160 | 165 | -60.000 | 6.6153 | 7.7973                          | 760.6           | 5.032  | 0.84841            |
| 165 | 170 | 40.001  | 0.6676 | 0.8611                          | 1017            | 0.679  | 0.77532            |
| 165 | 170 | 30.000  | 0.7666 | 0.9784                          | 1011            | 0.775  | 0.78352            |
| 165 | 170 | 25.000  | 0.8273 | 1.0509                          | 1007            | 0.833  | 0.78729            |
| 165 | 170 | 19.999  | 0.8922 | 1.1277                          | 1002            | 0.894  | 0.79113            |
| 165 | 170 | 15.000  | 0.9588 | 1.2061                          | 998.1           | 0.957  | 0.79497            |
| 165 | 170 | 10.000  | 1.0447 | 1.3078                          | 992.5           | 1.037  | 0.79882            |
| 165 | 170 | -0.002  | 1.2569 | 1.5584                          | 979.5           | 1.231  | 0.80652            |
| 165 | 170 | -5.001  | 1.4231 | 1.7563                          | 972.3           | 1.384  | 0.81029            |
| 165 | 170 | -10.001 | 1.5814 | 1.9425                          | 963.7           | 1.524  | 0.81409            |
| 165 | 170 | -15.001 | 1.7696 | 2.1635                          | 954.0           | 1.688  | 0.81791            |
| 165 | 170 | -20.002 | 1.9960 | 2.4292                          | 942.5           | 1.881  | 0.82166            |
| 165 | 170 | -25.000 | 2.2643 | 2.7431                          | 929.2           | 2.104  | 0.82546            |
| 165 | 170 | -30.001 | 2.5860 | 3.1184                          | 913.8           | 2.363  | 0.82927            |
| 165 | 170 | -35.000 | 2.9781 | 3.5748                          | 895.8           | 2.668  | 0.83309            |
| 165 | 170 | -40.001 | 3.4852 | 4.1643                          | 874.3           | 3.047  | 0.83691            |
| 165 | 170 | -45.001 | 4.0867 | 4.8608                          | 848.5           | 3.467  | 0.84074            |
| 165 | 170 | -50.002 | 4.8941 | 5.7947                          | 817.1           | 3.999  | 0.84457            |
| 165 | 170 | -55.000 | 5.9533 | 7.0171                          | 779.4           | 4.640  | 0.84839            |
| 165 | 170 | -60.000 | 7.4128 | 8.6987                          | 733.0           | 5.433  | 0.85218            |
| 170 | 175 | 40.003  | 0.7483 | 0.9615                          | 1009            | 0.755  | 0.77828            |
| 170 | 175 | 30.001  | 0.8534 | 1.0852                          | 1002            | 0.855  | 0.78637            |
| 170 | 175 | 24.999  | 0.9172 | 1.1608                          | 998.2           | 0.916  | 0.79015            |
| 170 | 175 | 20.000  | 0.9896 | 1.2464                          | 993.5           | 0.983  | 0.79400            |
| 170 | 175 | 15.000  | 1.0713 | 1.3427                          | 988.4           | 1.059  | 0.79786            |
| 170 | 175 | 9.999   | 1.1643 | 1.4523                          | 982.6           | 1.144  | 0.80171            |
| 170 | 175 | -0.004  | 1.3936 | 1.7218                          | 968.9           | 1.350  | 0.80937            |
| 170 | 175 | -5.002  | 1.5800 | 1.9431                          | 960.5           | 1.518  | 0.81314            |
| 170 | 175 | -10.002 | 1.7606 | 2.1551                          | 951.0           | 1.674  | 0.81692            |
| 170 | 175 | -15.001 | 1.9743 | 2.4058                          | 940.0           | 1.856  | 0.82067            |
| 170 | 175 | -20.001 | 2.2295 | 2.7043                          | 927.4           | 2.068  | 0.82443            |
| 170 | 175 | -25.001 | 2.5362 | 3.0623                          | 912.5           | 2.314  | 0.82820            |
| 170 | 175 | -30.001 | 2.9098 | 3.4976                          | 895.0           | 2.604  | 0.83193            |
| 170 | 175 | -35.002 | 3.3720 | 4.0352                          | 874.4           | 2.948  | 0.83565            |
| 170 | 175 | -40.002 | 3.9704 | 4.7300                          | 849.9           | 3.375  | 0.83942            |
| 170 | 175 | -45.001 | 4.7029 | 5.5785                          | 820.0           | 3.856  | 0.84304            |

| IBP | FBP | Cell Temp. | Dyn. Visc. | Kin. Visc.                      | Shear Rate      | Shear Stress | Density            |
|-----|-----|------------|------------|---------------------------------|-----------------|--------------|--------------------|
| °C  | °C  | °C         | mPa s      | mm <sup>2</sup> s <sup>-1</sup> | s <sup>-1</sup> | Pa           | g cm <sup>-3</sup> |
| 170 | 175 | -50.001    | 5.6747     | 6.6997                          | 784.5           | 4.452        | 0.84702            |
| 170 | 175 | -55.000    | 6.9896     | 8.2157                          | 741.3           | 5.181        | 0.85076            |
| 170 | 175 | -60.000    | 8.8348     | 10.338                          | 688.3           | 6.081        | 0.85456            |
| 175 | 180 | 40.001     | 0.7919     | 1.0146                          | 1005            | 0.796        | 0.78048            |
| 175 | 180 | 29.999     | 0.9098     | 1.1538                          | 997.1           | 0.907        | 0.78856            |
| 175 | 180 | 24.999     | 0.9792     | 1.2360                          | 992.6           | 0.972        | 0.79226            |
| 175 | 180 | 19.999     | 1.0593     | 1.3308                          | 987.5           | 1.046        | 0.79602            |
| 175 | 180 | 14.999     | 1.1505     | 1.4385                          | 981.7           | 1.130        | 0.79981            |
| 175 | 180 | 9.998      | 1.2549     | 1.5616                          | 975.2           | 1.224        | 0.80360            |
| 175 | 180 | -0.001     | 1.5116     | 1.8635                          | 960.0           | 1.451        | 0.81117            |
| 175 | 180 | -5.001     | 1.7166     | 2.1065                          | 950.6           | 1.632        | 0.81490            |
| 175 | 180 | -10.001    | 1.9213     | 2.3469                          | 939.9           | 1.806        | 0.81865            |
| 175 | 180 | -15.000    | 2.1652     | 2.6330                          | 927.5           | 2.008        | 0.82235            |
| 175 | 180 | -20.000    | 2.4583     | 2.9759                          | 913.0           | 2.245        | 0.82608            |
| 175 | 180 | -25.002    | 2.8114     | 3.3879                          | 896.1           | 2.520        | 0.82984            |
| 175 | 180 | -30.001    | 3.2471     | 3.8953                          | 876.3           | 2.845        | 0.83360            |
| 175 | 180 | -35.001    | 3.7898     | 4.5258                          | 852.8           | 3.232        | 0.83738            |
| 175 | 180 | -40.001    | 4.5051     | 5.3559                          | 824.6           | 3.715        | 0.84115            |
| 175 | 180 | -45.002    | 5.3802     | 6.3676                          | 790.8           | 4.255        | 0.84493            |
| 175 | 180 | -50.002    | 6.5777     | 7.7501                          | 750.0           | 4.933        | 0.84872            |
| 175 | 180 | -55.001    | 8.2210     | 9.6434                          | 700.6           | 5.760        | 0.85250            |
| 175 | 180 | -60.000    | 10.556     | 12.328                          | 641.1           | 6.767        | 0.85621            |
| 180 | 185 | 60.001     | 0.6455     | 0.8393                          | 1014            | 0.654        | 0.76902            |
| 180 | 185 | 39.998     | 0.8337     | 1.0624                          | 1001            | 0.834        | 0.78476            |
| 180 | 185 | 30.000     | 0.9621     | 1.2141                          | 992.2           | 0.955        | 0.79239            |
| 180 | 185 | 24.999     | 1.0405     | 1.3071                          | 987.1           | 1.027        | 0.79603            |
| 180 | 185 | 20.001     | 1.1287     | 1.4113                          | 981.4           | 1.108        | 0.79976            |
| 180 | 185 | 14.999     | 1.2289     | 1.5294                          | 975.1           | 1.198        | 0.80352            |
| 180 | 185 | 9.999      | 1.3437     | 1.6645                          | 968.1           | 1.301        | 0.80729            |
| 180 | 185 | -0.002     | 1.6295     | 1.9998                          | 951.2           | 1.550        | 0.81482            |
| 180 | 185 | -5.001     | 1.8523     | 2.2629                          | 940.9           | 1.743        | 0.81854            |
| 180 | 185 | -10.001    | 2.0801     | 2.5297                          | 929.1           | 1.933        | 0.82227            |
| 180 | 185 | -14.999    | 2.3516     | 2.8469                          | 915.4           | 2.153        | 0.82602            |
| 180 | 185 | -20.001    | 2.6808     | 3.2311                          | 899.5           | 2.411        | 0.82969            |
| 180 | 185 | -25.002    | 3.0805     | 3.6962                          | 880.7           | 2.713        | 0.83342            |
| 180 | 185 | -30.000    | 3.5769     | 4.2726                          | 858.6           | 3.071        | 0.83717            |
| 180 | 185 | -35.001    | 4.2020     | 4.9969                          | 832.4           | 3.498        | 0.84093            |
| 180 | 185 | -40.000    | 5.0321     | 5.9573                          | 801.1           | 4.031        | 0.84469            |
| 180 | 185 | -45.000    | 6.0613     | 7.1439                          | 763.4           | 4.627        | 0.84846            |
| 180 | 185 | -50.001    | 7.4860     | 8.7840                          | 718.1           | 5.376        | 0.85223            |
| 180 | 185 | -55.000    | 9.4730     | 11.067                          | 663.5           | 6.286        | 0.85599            |
| 180 | 185 | -60.000    | 12.334     | 14.347                          | 598.5           | 7.382        | 0.85970            |
| 185 | 190 | 60.000     | 0.6801     | 0.8800                          | 1010            | 0.687        | 0.77280            |
| 185 | 190 | 39.999     | 0.8818     | 1.1183                          | 996.0           | 0.878        | 0.78855            |
| 185 | 190 | 29.998     | 1.0216     | 1.2831                          | 986.7           | 1.008        | 0.79624            |
| 185 | 190 | 24.999     | 1.1067     | 1.3836                          | 981.2           | 1.086        | 0.79985            |
| 185 | 190 | 19.999     | 1.2024     | 1.4963                          | 975.1           | 1.173        | 0.80359            |

| IBP | FBP | Cell Temp. | Dyn. Visc. | Kin. Visc.                      | Shear Rate      | Shear Stress | Density            |
|-----|-----|------------|------------|---------------------------------|-----------------|--------------|--------------------|
| °C  | °C  | °C         | mPa s      | mm <sup>2</sup> s <sup>-1</sup> | s <sup>-1</sup> | Pa           | g cm <sup>-3</sup> |
| 185 | 190 | 14.999     | 1.3114     | 1.6244                          | 968.3           | 1.270        | 0.80735            |
| 185 | 190 | 9.999      | 1.4368     | 1.7714                          | 960.6           | 1.380        | 0.81109            |
| 185 | 190 | -0.002     | 1.7507     | 2.1386                          | 942.3           | 1.650        | 0.81861            |
| 185 | 190 | -5.001     | 1.9945     | 2.4255                          | 931.0           | 1.857        | 0.82229            |
| 185 | 190 | -10.001    | 2.2469     | 2.7202                          | 918.1           | 2.063        | 0.82600            |
| 185 | 190 | -15.001    | 2.5501     | 3.0736                          | 903.0           | 2.303        | 0.82968            |
| 185 | 190 | -20.001    | 2.9189     | 3.5025                          | 885.4           | 2.584        | 0.83337            |
| 185 | 190 | -25.002    | 3.3703     | 4.0263                          | 864.7           | 2.914        | 0.83708            |
| 185 | 190 | -30.001    | 3.9349     | 4.6799                          | 840.3           | 3.306        | 0.84080            |
| 185 | 190 | -35.001    | 4.6525     | 5.5089                          | 811.3           | 3.775        | 0.84454            |
| 185 | 190 | -40.002    | 5.6142     | 6.6182                          | 776.6           | 4.360        | 0.84829            |
| 185 | 190 | -45.001    | 6.8242     | 8.0093                          | 734.9           | 5.015        | 0.85204            |
| 185 | 190 | -50.002    | 8.5175     | 9.9528                          | 685.1           | 5.835        | 0.85579            |
| 185 | 190 | -55.000    | 10.911     | 12.694                          | 625.5           | 6.825        | 0.85954            |
| 185 | 190 | -60.000    | 14.417     | 16.701                          | 555.4           | 8.007        | 0.86325            |
| 190 | 195 | 39.999     | 1.0229     | 1.2896                          | 982.5           | 1.005        | 0.79320            |
| 190 | 195 | 29.998     | 1.1799     | 1.4734                          | 972.5           | 1.147        | 0.80077            |
| 190 | 195 | 25.000     | 1.2777     | 1.5884                          | 966.4           | 1.235        | 0.80438            |
| 190 | 195 | 20.000     | 1.3895     | 1.7195                          | 959.5           | 1.333        | 0.80808            |
| 190 | 195 | 14.999     | 1.5181     | 1.8700                          | 951.7           | 1.445        | 0.81181            |
| 190 | 195 | 9.999      | 1.6667     | 2.0436                          | 942.9           | 1.572        | 0.81554            |
| 190 | 195 | -0.003     | 2.0433     | 2.4829                          | 921.7           | 1.883        | 0.82297            |
| 190 | 195 | -5.000     | 2.3281     | 2.8163                          | 908.7           | 2.115        | 0.82665            |
| 190 | 195 | -10.001    | 2.6312     | 3.1688                          | 893.6           | 2.351        | 0.83034            |
| 190 | 195 | -15.001    | 2.9974     | 3.5940                          | 876.1           | 2.626        | 0.83400            |
| 190 | 195 | -20.001    | 3.4468     | 4.1148                          | 855.7           | 2.949        | 0.83766            |
| 190 | 195 | -25.000    | 3.9886     | 4.7419                          | 832.4           | 3.320        | 0.84113            |
| 190 | 195 | -30.000    | 4.6936     | 5.5552                          | 803.8           | 3.773        | 0.84492            |
| 190 | 195 | -35.001    | 5.5876     | 6.5841                          | 770.6           | 4.306        | 0.84864            |
| 190 | 195 | -40.001    | 6.7996     | 7.9774                          | 731.0           | 4.970        | 0.85235            |
| 190 | 195 | -45.001    | 8.3542     | 9.7593                          | 683.7           | 5.712        | 0.85603            |
| 190 | 195 | -50.001    | 10.567     | 12.291                          | 627.6           | 6.632        | 0.85979            |
| 190 | 195 | -55.000    | 13.782     | 15.960                          | 561.2           | 7.735        | 0.86350            |
| 195 | 200 | 59.999     | 0.7666     | 0.9807                          | 1001            | 0.767        | 0.78163            |
| 195 | 200 | 40.000     | 1.0090     | 1.2660                          | 983.7           | 0.993        | 0.79702            |
| 195 | 200 | 29.999     | 1.1784     | 1.4645                          | 972.6           | 1.146        | 0.80459            |
| 195 | 200 | 25.000     | 1.2831     | 1.5879                          | 965.8           | 1.239        | 0.80806            |
| 195 | 200 | 19.999     | 1.4020     | 1.7269                          | 958.3           | 1.344        | 0.81182            |
| 195 | 200 | 15.000     | 1.5388     | 1.8869                          | 950.0           | 1.462        | 0.81551            |
| 195 | 200 | 9.999      | 1.6977     | 2.0723                          | 940.5           | 1.597        | 0.81922            |
| 195 | 200 | -0.002     | 2.1030     | 2.5440                          | 917.6           | 1.930        | 0.82662            |
| 195 | 200 | -5.001     | 2.4057     | 2.8974                          | 903.6           | 2.174        | 0.83028            |
| 195 | 200 | -10.001    | 2.7350     | 3.2796                          | 887.2           | 2.427        | 0.83395            |
| 195 | 200 | -15.002    | 3.1372     | 3.7456                          | 868.0           | 2.723        | 0.83759            |
| 195 | 200 | -20.001    | 3.6330     | 4.3186                          | 845.7           | 3.072        | 0.84125            |
| 195 | 200 | -25.001    | 4.2515     | 5.0318                          | 819.3           | 3.483        | 0.84493            |
| 195 | 200 | -30.000    | 5.0427     | 5.9422                          | 788.1           | 3.974        | 0.84863            |

| IBP | FBP | Cell Temp. | Dyn. Visc. | Kin. Visc.                      | Shear Rate      | Shear Stress | Density            |
|-----|-----|------------|------------|---------------------------------|-----------------|--------------|--------------------|
| °C  | °C  | °C         | mPa s      | mm <sup>2</sup> s <sup>-1</sup> | s <sup>-1</sup> | Pa           | g cm <sup>-3</sup> |
| 195 | 200 | -35.002    | 6.0729     | 7.1250                          | 751.0           | 4.561        | 0.85233            |
| 195 | 200 | -40.000    | 7.4855     | 8.7443                          | 707.0           | 5.292        | 0.85605            |
| 195 | 200 | -45.001    | 9.3307     | 10.853                          | 654.6           | 6.108        | 0.85976            |
| 195 | 200 | -50.001    | 11.995     | 13.891                          | 593.0           | 7.112        | 0.86348            |
| 195 | 200 | -55.000    | 15.893     | 18.327                          | 521.8           | 8.293        | 0.86719            |
| 200 | 205 | 60.000     | 0.8109     | 1.0318                          | 995.7           | 0.807        | 0.78587            |
| 200 | 205 | 40.000     | 1.0724     | 1.3389                          | 977.7           | 1.049        | 0.80100            |
| 200 | 205 | 29.998     | 1.2575     | 1.5550                          | 965.6           | 1.214        | 0.80865            |
| 200 | 205 | 24.998     | 1.3718     | 1.6889                          | 958.3           | 1.315        | 0.81222            |
| 200 | 205 | 19.999     | 1.5031     | 1.8423                          | 950.1           | 1.428        | 0.81588            |
| 200 | 205 | 15.000     | 1.6547     | 2.0190                          | 941.0           | 1.557        | 0.81958            |
| 200 | 205 | 9.999      | 1.8326     | 2.2260                          | 930.5           | 1.705        | 0.82328            |
| 200 | 205 | -0.002     | 2.2884     | 2.7550                          | 905.2           | 2.071        | 0.83065            |
| 200 | 205 | -5.002     | 2.6273     | 3.1491                          | 889.5           | 2.337        | 0.83430            |
| 200 | 205 | -10.001    | 3.0008     | 3.5812                          | 871.3           | 2.615        | 0.83795            |
| 200 | 205 | -15.000    | 3.4596     | 4.1106                          | 850.0           | 2.941        | 0.84163            |
| 200 | 205 | -20.000    | 4.0312     | 4.7694                          | 825.0           | 3.326        | 0.84523            |
| 200 | 205 | -25.001    | 4.7519     | 5.5978                          | 795.6           | 3.781        | 0.84888            |
| 200 | 205 | -30.001    | 5.6821     | 6.6649                          | 760.8           | 4.323        | 0.85254            |
| 200 | 205 | -35.002    | 6.9074     | 8.0672                          | 719.6           | 4.971        | 0.85623            |
| 200 | 205 | -40.000    | 8.6114     | 10.014                          | 670.7           | 5.776        | 0.85992            |
| 200 | 205 | -45.001    | 10.875     | 12.592                          | 613.2           | 6.669        | 0.86361            |
| 200 | 205 | -50.001    | 14.190     | 16.360                          | 546.5           | 7.755        | 0.86731            |
| 200 | 205 | -55.001    | 19.130     | 21.963                          | 471.0           | 9.011        | 0.87101            |
| 205 | 210 | 60.001     | 0.8511     | 1.0759                          | 991.5           | 0.844        | 0.79113            |
| 205 | 210 | 39.999     | 1.1317     | 1.4035                          | 972.2           | 1.100        | 0.80632            |
| 205 | 210 | 30.000     | 1.3318     | 1.6361                          | 959.1           | 1.277        | 0.81398            |
| 205 | 210 | 24.999     | 1.4563     | 1.7814                          | 951.2           | 1.385        | 0.81746            |
| 205 | 210 | 19.999     | 1.5991     | 1.9473                          | 942.4           | 1.507        | 0.82118            |
| 205 | 210 | 14.999     | 1.7654     | 2.1402                          | 932.5           | 1.646        | 0.82487            |
| 205 | 210 | 9.999      | 1.9601     | 2.3658                          | 921.3           | 1.806        | 0.82854            |
| 205 | 210 | -0.001     | 2.4599     | 2.9428                          | 893.9           | 2.199        | 0.83590            |
| 205 | 210 | -5.001     | 2.8310     | 3.3721                          | 876.8           | 2.482        | 0.83953            |
| 205 | 210 | -10.001    | 3.2452     | 3.8488                          | 857.1           | 2.781        | 0.84317            |
| 205 | 210 | -15.000    | 3.7550     | 4.4342                          | 834.0           | 3.132        | 0.84683            |
| 205 | 210 | -20.001    | 4.3960     | 5.1692                          | 806.9           | 3.547        | 0.85042            |
| 205 | 210 | -25.002    | 5.2093     | 6.0994                          | 775.0           | 4.038        | 0.85407            |
| 205 | 210 | -30.001    | 6.2668     | 7.3062                          | 737.4           | 4.621        | 0.85774            |
| 205 | 210 | -35.001    | 7.6727     | 8.9071                          | 693.0           | 5.317        | 0.86142            |
| 205 | 210 | -40.001    | 9.6474     | 11.152                          | 640.5           | 6.180        | 0.86511            |
| 205 | 210 | -45.001    | 12.298     | 14.155                          | 579.4           | 7.126        | 0.86880            |
| 205 | 210 | -50.001    | 16.227     | 18.599                          | 509.5           | 8.268        | 0.87249            |
| 205 | 210 | -55.001    | 22.169     | 25.302                          | 431.6           | 9.568        | 0.87618            |
| 210 | 215 | 60.002     | 0.8943     | 1.1275                          | 987.0           | 0.883        | 0.79316            |
| 210 | 215 | 39.999     | 1.1890     | 1.4711                          | 966.9           | 1.150        | 0.80823            |
| 210 | 215 | 29.998     | 1.4068     | 1.7244                          | 952.7           | 1.340        | 0.81582            |
| 210 | 215 | 25.000     | 1.5429     | 1.8832                          | 944.2           | 1.457        | 0.81930            |

| IBP | FBP | Cell    | Dyn.   | Kin. Visc.                      | Shear           | Shear  | Density            |
|-----|-----|---------|--------|---------------------------------|-----------------|--------|--------------------|
| °C  | °C  | Temp.   | Visc.  |                                 | Rate            | Stress |                    |
|     |     | °C      | mPa s  | mm <sup>2</sup> s <sup>-1</sup> | s <sup>-1</sup> | Pa     | g cm <sup>-3</sup> |
| 210 | 215 | 19.998  | 1.6980 | 2.0632                          | 934.7           | 1.587  | 0.82299            |
| 210 | 215 | 15.000  | 1.8787 | 2.2727                          | 924.0           | 1.736  | 0.82664            |
| 210 | 215 | 9.999   | 2.0898 | 2.5169                          | 912.0           | 1.906  | 0.83030            |
| 210 | 215 | -0.001  | 2.6422 | 3.1545                          | 882.2           | 2.331  | 0.83758            |
| 210 | 215 | -5.001  | 3.0465 | 3.6215                          | 863.9           | 2.632  | 0.84122            |
| 210 | 215 | -10.001 | 3.5059 | 4.1497                          | 842.4           | 2.954  | 0.84486            |
| 210 | 215 | -15.001 | 4.0749 | 4.8025                          | 817.5           | 3.331  | 0.84851            |
| 210 | 215 | -20.002 | 4.7927 | 5.6248                          | 788.1           | 3.777  | 0.85208            |
| 210 | 215 | -25.002 | 5.7131 | 6.6778                          | 753.6           | 4.305  | 0.85554            |
| 210 | 215 | -30.001 | 6.9211 | 8.0542                          | 712.9           | 4.934  | 0.85932            |
| 210 | 215 | -35.001 | 8.5421 | 9.8983                          | 665.0           | 5.680  | 0.86299            |
| 210 | 215 | -40.001 | 10.980 | 12.670                          | 608.8           | 6.685  | 0.86665            |
| 210 | 215 | -45.001 | 13.982 | 16.066                          | 544.0           | 7.606  | 0.87033            |
| 210 | 215 | -50.001 | 18.692 | 21.386                          | 470.9           | 8.801  | 0.87401            |
| 210 | 215 | -55.001 | 25.931 | 29.546                          | 391.0           | 10.14  | 0.87764            |
| 215 | 220 | 60.001  | 0.9404 | 1.1861                          | 982.2           | 0.924  | 0.79281            |
| 215 | 220 | 39.999  | 1.2681 | 1.5700                          | 959.8           | 1.217  | 0.80772            |
| 215 | 220 | 29.999  | 1.5064 | 1.8480                          | 944.4           | 1.423  | 0.81515            |
| 215 | 220 | 24.999  | 1.6554 | 2.0223                          | 935.1           | 1.548  | 0.81859            |
| 215 | 220 | 20.000  | 1.8273 | 2.2222                          | 924.8           | 1.690  | 0.82226            |
| 215 | 220 | 14.999  | 2.0298 | 2.4580                          | 913.0           | 1.853  | 0.82580            |
| 215 | 220 | 9.999   | 2.2681 | 2.7351                          | 899.6           | 2.040  | 0.82923            |
| 215 | 220 | -0.002  | 2.8916 | 3.4575                          | 866.8           | 2.506  | 0.83633            |
| 215 | 220 | -5.001  | 3.3507 | 3.9895                          | 846.2           | 2.835  | 0.83990            |
| 215 | 220 | -10.001 | 3.8789 | 4.5994                          | 822.3           | 3.190  | 0.84336            |
| 215 | 220 | -15.001 | 4.5396 | 5.3603                          | 794.4           | 3.606  | 0.84689            |
| 215 | 220 | -20.001 | 5.3930 | 6.3412                          | 761.7           | 4.108  | 0.85047            |
| 215 | 220 | -25.001 | 6.4782 | 7.5850                          | 723.2           | 4.685  | 0.85408            |
| 215 | 220 | -30.002 | 7.9321 | 9.2478                          | 678.0           | 5.378  | 0.85773            |
| 215 | 220 | -35.002 | 9.9115 | 11.506                          | 625.2           | 6.197  | 0.86139            |
| 215 | 220 | -40.001 | 12.912 | 14.926                          | 564.2           | 7.285  | 0.86507            |
| 215 | 220 | -45.001 | 16.703 | 19.226                          | 495.0           | 8.268  | 0.86876            |
| 215 | 220 | -50.001 | 22.742 | 26.067                          | 418.7           | 9.521  | 0.87247            |
| 220 | 225 | 60.002  | 0.9911 | 1.2481                          | 977.1           | 0.968  | 0.79404            |
| 220 | 225 | 40.000  | 1.3430 | 1.6601                          | 953.1           | 1.280  | 0.80894            |
| 220 | 225 | 29.998  | 1.6037 | 1.9641                          | 936.4           | 1.502  | 0.81650            |
| 220 | 225 | 25.000  | 1.7671 | 2.1552                          | 926.4           | 1.637  | 0.81992            |
| 220 | 225 | 19.999  | 1.9566 | 2.3757                          | 915.1           | 1.790  | 0.82358            |
| 220 | 225 | 14.999  | 2.1803 | 2.6357                          | 902.2           | 1.967  | 0.82719            |
| 220 | 225 | 10.000  | 2.4455 | 2.9435                          | 887.6           | 2.171  | 0.83081            |
| 220 | 225 | -0.001  | 3.1440 | 3.7516                          | 851.6           | 2.678  | 0.83805            |
| 220 | 225 | -5.002  | 3.6557 | 4.3436                          | 829.1           | 3.031  | 0.84162            |
| 220 | 225 | -10.000 | 4.2555 | 5.0349                          | 803.0           | 3.417  | 0.84521            |
| 220 | 225 | -15.001 | 5.0123 | 5.9050                          | 772.3           | 3.871  | 0.84881            |
| 220 | 225 | -20.001 | 5.9991 | 7.0382                          | 736.3           | 4.417  | 0.85236            |
| 220 | 225 | -25.001 | 7.2658 | 8.4887                          | 694.3           | 5.045  | 0.85594            |
| 220 | 225 | -30.000 | 8.9829 | 10.451                          | 645.2           | 5.795  | 0.85955            |

| IBP | FBP | Cell Temp. | Dyn. Visc. | Kin. Visc.                      | Shear Rate      | Shear Stress | Density            |
|-----|-----|------------|------------|---------------------------------|-----------------|--------------|--------------------|
| °C  | °C  | °C         | mPa s      | mm <sup>2</sup> s <sup>-1</sup> | s <sup>-1</sup> | Pa           | g cm <sup>-3</sup> |
| 220 | 225 | -35.001    | 11.354     | 13.154                          | 588.2           | 6.678        | 0.86318            |
| 220 | 225 | -40.002    | 14.986     | 17.289                          | 523.1           | 7.839        | 0.86681            |
| 220 | 225 | -45.001    | 19.679     | 22.608                          | 450.6           | 8.867        | 0.87045            |
| 220 | 225 | -50.002    | 27.254     | 31.180                          | 372.6           | 10.16        | 0.87410            |
| 225 | 230 | 60.002     | 1.0476     | 1.3145                          | 971.4           | 1.018        | 0.79698            |
| 225 | 230 | 39.999     | 1.4332     | 1.7653                          | 945.2           | 1.355        | 0.81189            |
| 225 | 230 | 30.000     | 1.7201     | 2.0991                          | 927.0           | 1.595        | 0.81942            |
| 225 | 230 | 24.999     | 1.9009     | 2.3101                          | 916.0           | 1.741        | 0.82285            |
| 225 | 230 | 20.000     | 2.1115     | 2.5548                          | 903.7           | 1.908        | 0.82651            |
| 225 | 230 | 15.000     | 2.3598     | 2.8428                          | 889.7           | 2.100        | 0.83011            |
| 225 | 230 | 9.999      | 2.6551     | 3.1846                          | 873.8           | 2.320        | 0.83372            |
| 225 | 230 | -0.002     | 3.4471     | 4.0992                          | 834.1           | 2.875        | 0.84092            |
| 225 | 230 | -5.001     | 4.0286     | 4.7708                          | 809.2           | 3.260        | 0.84443            |
| 225 | 230 | -10.000    | 4.7188     | 5.5643                          | 780.3           | 3.682        | 0.84805            |
| 225 | 230 | -15.001    | 5.5978     | 6.5729                          | 746.6           | 4.179        | 0.85165            |
| 225 | 230 | -20.001    | 6.7537     | 7.8974                          | 707.1           | 4.775        | 0.85518            |
| 225 | 230 | -25.001    | 8.2600     | 9.6187                          | 661.0           | 5.460        | 0.85875            |
| 225 | 230 | -30.001    | 10.332     | 11.981                          | 607.4           | 6.275        | 0.86235            |
| 225 | 230 | -35.001    | 13.229     | 15.276                          | 546.0           | 7.223        | 0.86597            |
| 225 | 230 | -40.000    | 17.723     | 20.381                          | 477.1           | 8.456        | 0.86960            |
| 225 | 230 | -45.001    | 23.687     | 27.126                          | 402.0           | 9.522        | 0.87323            |
| 225 | 230 | -50.000    | 44.874     | 51.191                          | 260.6           | 11.70        | 0.87659            |
| 230 | 235 | 60.002     | 1.1365     | 1.4210                          | 962.5           | 1.094        | 0.79979            |
| 230 | 235 | 39.999     | 1.5645     | 1.9211                          | 933.9           | 1.461        | 0.81440            |
| 230 | 235 | 29.998     | 1.8880     | 2.2982                          | 913.8           | 1.725        | 0.82152            |
| 230 | 235 | 24.999     | 2.0939     | 2.5372                          | 901.5           | 1.888        | 0.82530            |
| 230 | 235 | 20.000     | 2.3358     | 2.8178                          | 887.7           | 2.074        | 0.82896            |
| 230 | 235 | 14.999     | 2.6236     | 3.1513                          | 871.9           | 2.288        | 0.83254            |
| 230 | 235 | 9.999      | 2.9688     | 3.5507                          | 853.8           | 2.535        | 0.83612            |
| 230 | 235 | -0.002     | 3.9012     | 4.6262                          | 809.1           | 3.157        | 0.84329            |
| 230 | 235 | -5.001     | 4.5865     | 5.4161                          | 781.1           | 3.582        | 0.84684            |
| 230 | 235 | -10.001    | 5.4214     | 6.3751                          | 748.3           | 4.057        | 0.85040            |
| 230 | 235 | -15.002    | 6.4927     | 7.6028                          | 710.3           | 4.612        | 0.85399            |
| 230 | 235 | -20.001    | 7.9192     | 9.2353                          | 666.1           | 5.275        | 0.85749            |
| 230 | 235 | -25.000    | 9.8565     | 11.448                          | 613.6           | 6.048        | 0.86099            |
| 230 | 235 | -30.002    | 12.447     | 14.396                          | 556.2           | 6.923        | 0.86462            |
| 230 | 235 | -35.001    | 16.189     | 18.646                          | 490.5           | 7.940        | 0.86824            |
| 230 | 235 | -40.002    | 22.100     | 25.350                          | 418.3           | 9.245        | 0.87183            |
| 230 | 235 | -44.999    | 42.634     | 48.716                          | 266.1           | 11.34        | 0.87516            |
| 235 | 240 | 60.003     | 1.1764     | 1.4679                          | 958.6           | 1.128        | 0.80141            |
| 235 | 240 | 39.999     | 1.6349     | 2.0036                          | 928.0           | 1.517        | 0.81599            |
| 235 | 240 | 29.999     | 1.9847     | 2.4103                          | 906.4           | 1.799        | 0.82341            |
| 235 | 240 | 24.999     | 2.2074     | 2.6697                          | 893.2           | 1.972        | 0.82682            |
| 235 | 240 | 19.999     | 2.4710     | 2.9755                          | 878.4           | 2.170        | 0.83043            |
| 235 | 240 | 14.999     | 2.7822     | 3.3360                          | 861.6           | 2.397        | 0.83399            |
| 235 | 240 | 10.000     | 3.1593     | 3.7720                          | 842.2           | 2.661        | 0.83755            |
| 235 | 240 | -0.001     | 4.1858     | 4.9555                          | 794.2           | 3.324        | 0.84468            |



| IBP | FBP | Cell Temp. | Dyn. Visc. | Kin. Visc.                      | Shear Rate      | Shear Stress | Density            |
|-----|-----|------------|------------|---------------------------------|-----------------|--------------|--------------------|
| °C  | °C  | °C         | mPa s      | mm <sup>2</sup> s <sup>-1</sup> | s <sup>-1</sup> | Pa           | g cm <sup>-3</sup> |
| 235 | 240 | -5.000     | 4.9426     | 5.8274                          | 764.1           | 3.777        | 0.84816            |
| 235 | 240 | -10.001    | 5.8677     | 6.8890                          | 729.3           | 4.279        | 0.85175            |
| 235 | 240 | -15.001    | 7.0688     | 8.2647                          | 688.8           | 4.869        | 0.85531            |
| 235 | 240 | -20.001    | 8.6819     | 10.109                          | 641.7           | 5.571        | 0.85880            |
| 235 | 240 | -25.001    | 10.836     | 12.565                          | 587.7           | 6.368        | 0.86234            |
| 235 | 240 | -30.001    | 13.865     | 16.012                          | 526.4           | 7.299        | 0.86591            |
| 235 | 240 | -35.001    | 18.242     | 20.980                          | 458.1           | 8.357        | 0.86950            |
| 235 | 240 | -40.001    | 25.207     | 28.871                          | 384.7           | 9.696        | 0.87308            |
| 240 | 245 | 60.003     | 1.2510     | 1.5550                          | 951.4           | 1.190        | 0.80452            |
| 240 | 245 | 40.000     | 1.7518     | 2.1391                          | 918.3           | 1.609        | 0.81893            |
| 240 | 245 | 30.000     | 2.1387     | 2.5892                          | 894.7           | 1.914        | 0.82601            |
| 240 | 245 | 25.000     | 2.3865     | 2.8763                          | 880.4           | 2.101        | 0.82971            |
| 240 | 245 | 19.998     | 2.6798     | 3.2159                          | 864.3           | 2.316        | 0.83329            |
| 240 | 245 | 14.998     | 3.0318     | 3.6229                          | 845.8           | 2.564        | 0.83683            |
| 240 | 245 | 9.999      | 3.4588     | 4.1158                          | 824.5           | 2.852        | 0.84038            |
| 240 | 245 | -0.001     | 4.6333     | 5.4673                          | 771.8           | 3.576        | 0.84745            |
| 240 | 245 | -5.001     | 5.5033     | 6.4673                          | 738.8           | 4.066        | 0.85095            |
| 240 | 245 | -10.000    | 6.5821     | 7.7028                          | 700.7           | 4.612        | 0.85451            |
| 240 | 245 | -15.002    | 8.0010     | 9.3253                          | 656.5           | 5.253        | 0.85799            |
| 240 | 245 | -20.000    | 9.9202     | 11.515                          | 605.7           | 6.009        | 0.86150            |
| 240 | 245 | -25.001    | 12.517     | 14.470                          | 548.0           | 6.860        | 0.86505            |
| 240 | 245 | -30.001    | 16.219     | 18.672                          | 483.5           | 7.841        | 0.86862            |
| 240 | 245 | -35.001    | 21.629     | 24.798                          | 413.2           | 8.937        | 0.87219            |
| 240 | 245 | -40.000    | 97.233     | 111.09                          | 134.1           | 13.04        | 0.87524            |
| 245 | 250 | 60.001     | 1.3258     | 1.6455                          | 944.2           | 1.252        | 0.80572            |
| 245 | 250 | 39.999     | 1.8788     | 2.2917                          | 908.0           | 1.706        | 0.81983            |
| 245 | 250 | 29.999     | 2.3089     | 2.7929                          | 882.2           | 2.037        | 0.82671            |
| 245 | 250 | 24.999     | 2.5850     | 3.1139                          | 866.7           | 2.240        | 0.83013            |
| 245 | 250 | 19.999     | 2.9136     | 3.4945                          | 849.0           | 2.474        | 0.83378            |
| 245 | 250 | 14.999     | 3.3099     | 3.9527                          | 828.7           | 2.743        | 0.83738            |
| 245 | 250 | 10.000     | 3.7941     | 4.5117                          | 805.5           | 3.056        | 0.84095            |
| 245 | 250 | -0.001     | 5.1380     | 6.0582                          | 748.0           | 3.843        | 0.84810            |
| 245 | 250 | -5.001     | 6.1414     | 7.2116                          | 712.0           | 4.373        | 0.85160            |
| 245 | 250 | -10.000    | 7.4034     | 8.6573                          | 670.5           | 4.964        | 0.85516            |
| 245 | 250 | -15.001    | 9.0786     | 10.573                          | 622.8           | 5.654        | 0.85866            |
| 245 | 250 | -20.000    | 11.371     | 13.188                          | 568.5           | 6.464        | 0.86221            |
| 245 | 250 | -25.001    | 14.518     | 16.769                          | 507.2           | 7.364        | 0.86576            |
| 245 | 250 | -30.001    | 19.060     | 21.925                          | 440.1           | 8.388        | 0.86932            |
| 250 | 255 | 60.000     | 1.4015     | 1.7359                          | 937.1           | 1.313        | 0.80735            |
| 250 | 255 | 39.999     | 2.0051     | 2.4398                          | 898.0           | 1.801        | 0.82183            |
| 250 | 255 | 30.000     | 2.4792     | 2.9909                          | 870.1           | 2.157        | 0.82893            |
| 250 | 255 | 24.999     | 2.7858     | 3.3471                          | 853.1           | 2.377        | 0.83232            |
| 250 | 255 | 19.999     | 3.1528     | 3.7718                          | 833.9           | 2.629        | 0.83588            |
| 250 | 255 | 15.000     | 3.5980     | 4.2864                          | 811.8           | 2.921        | 0.83940            |
| 250 | 255 | 9.999      | 4.1452     | 4.9176                          | 786.5           | 3.260        | 0.84292            |
| 250 | 255 | -0.002     | 5.6851     | 6.6889                          | 723.7           | 4.115        | 0.84993            |
| 250 | 255 | -5.001     | 6.8411     | 8.0164                          | 684.7           | 4.684        | 0.85339            |

| IBP | FBP | Cell<br>Temp. | Dyn.<br>Visc. | Kin. Visc.                      | Shear<br>Rate   | Shear<br>Stress | Density            |
|-----|-----|---------------|---------------|---------------------------------|-----------------|-----------------|--------------------|
| °C  | °C  | °C            | mPa s         | mm <sup>2</sup> s <sup>-1</sup> | s <sup>-1</sup> | Pa              | g cm <sup>-3</sup> |
| 250 | 255 | -10.001       | 8.3136        | 9.7017                          | 639.9           | 5.320           | 0.85693            |
| 250 | 255 | -15.001       | 10.281        | 11.949                          | 588.9           | 6.055           | 0.86044            |
| 250 | 255 | -20.001       | 13.011        | 15.061                          | 531.3           | 6.912           | 0.86390            |
| 250 | 255 | -25.001       | 16.803        | 19.372                          | 467.4           | 7.854           | 0.86739            |
| 250 | 255 | -30.001       | 22.352        | 25.666                          | 398.6           | 8.910           | 0.87089            |

Table S8 – Viscosity, density, shear rate and shear stress determined at different temperatures for narrow boiling range distillation cuts of synthetic distillate. The data is the raw data collected from the instrument and not rounded.

| IBP<br>°C | FBP<br>°C | Cell<br>Temp.<br>°C | Dyn.<br>Visc.<br>mPa s | Kin. Visc.<br>mm <sup>2</sup> s <sup>-1</sup> | Shear<br>Rate<br>s <sup>-1</sup> | Shear<br>Stress<br>Pa | Density<br>g cm <sup>-3</sup> |
|-----------|-----------|---------------------|------------------------|-----------------------------------------------|----------------------------------|-----------------------|-------------------------------|
| 140       | 145       | 40.001              | 0.5303                 | 0.7391                                        | 1033                             | 0.548                 | 0.71744                       |
| 140       | 145       | 29.999              | 0.6015                 | 0.8287                                        | 1028                             | 0.619                 | 0.72581                       |
| 140       | 145       | 24.999              | 0.6422                 | 0.8801                                        | 1026                             | 0.659                 | 0.72969                       |
| 140       | 145       | 19.998              | 0.6876                 | 0.9373                                        | 1023                             | 0.703                 | 0.73362                       |
| 140       | 145       | 15.000              | 0.7373                 | 0.9997                                        | 1020                             | 0.752                 | 0.73755                       |
| 140       | 145       | 10.000              | 0.7948                 | 1.0721                                        | 1016                             | 0.808                 | 0.74140                       |
| 140       | 145       | -0.001              | 0.9281                 | 1.2385                                        | 1008                             | 0.936                 | 0.74937                       |
| 140       | 145       | -5.002              | 1.0429                 | 1.3848                                        | 1003                             | 1.046                 | 0.75312                       |
| 140       | 145       | -10.001             | 1.1440                 | 1.5113                                        | 998.1                            | 1.142                 | 0.75698                       |
| 140       | 145       | -15.001             | 1.2595                 | 1.6554                                        | 992.1                            | 1.250                 | 0.76082                       |
| 140       | 145       | -20.001             | 1.3966                 | 1.8265                                        | 984.8                            | 1.375                 | 0.76464                       |
| 140       | 145       | -25.001             | 1.5568                 | 2.0258                                        | 977.0                            | 1.521                 | 0.76848                       |
| 140       | 145       | -30.000             | 1.7430                 | 2.2568                                        | 967.7                            | 1.687                 | 0.77233                       |
| 140       | 145       | -35.001             | 1.9650                 | 2.5317                                        | 956.9                            | 1.880                 | 0.77618                       |
| 140       | 145       | -40.000             | 2.2099                 | 2.8337                                        | 945.4                            | 2.089                 | 0.77987                       |
| 140       | 145       | -45.001             | 2.5267                 | 3.2234                                        | 930.8                            | 2.352                 | 0.78386                       |
| 140       | 145       | -50.001             | 2.9177                 | 3.7040                                        | 913.2                            | 2.664                 | 0.78771                       |
| 140       | 145       | -55.000             | 3.3975                 | 4.2924                                        | 892.6                            | 3.033                 | 0.79153                       |
| 140       | 145       | -60.001             | 3.9884                 | 5.0150                                        | 868.7                            | 3.465                 | 0.79528                       |
| 145       | 150       | 60.000              | 0.4336                 | 0.6162                                        | 1039                             | 0.450                 | 0.70368                       |
| 145       | 150       | 39.998              | 0.5456                 | 0.7577                                        | 1031                             | 0.563                 | 0.72003                       |
| 145       | 150       | 29.999              | 0.6200                 | 0.8518                                        | 1027                             | 0.637                 | 0.72788                       |
| 145       | 150       | 24.998              | 0.6642                 | 0.9078                                        | 1024                             | 0.680                 | 0.73162                       |
| 145       | 150       | 19.998              | 0.7121                 | 0.9681                                        | 1021                             | 0.727                 | 0.73550                       |
| 145       | 150       | 14.999              | 0.7653                 | 1.0349                                        | 1017                             | 0.779                 | 0.73942                       |
| 145       | 150       | 9.999               | 0.8247                 | 1.1095                                        | 1014                             | 0.836                 | 0.74335                       |
| 145       | 150       | 0.000               | 0.9682                 | 1.2892                                        | 1005                             | 0.973                 | 0.75102                       |
| 145       | 150       | -5.000              | 1.0881                 | 1.4414                                        | 999.7                            | 1.088                 | 0.75489                       |
| 145       | 150       | -10.000             | 1.1974                 | 1.5782                                        | 993.9                            | 1.190                 | 0.75872                       |
| 145       | 150       | -15.000             | 1.3229                 | 1.7349                                        | 987.3                            | 1.306                 | 0.76256                       |
| 145       | 150       | -20.001             | 1.4687                 | 1.9165                                        | 979.7                            | 1.439                 | 0.76632                       |
| 145       | 150       | -25.002             | 1.6402                 | 2.1298                                        | 971.1                            | 1.593                 | 0.77013                       |
| 145       | 150       | -30.000             | 1.8416                 | 2.3796                                        | 961.1                            | 1.770                 | 0.77394                       |
| 145       | 150       | -35.001             | 2.0825                 | 2.6775                                        | 949.4                            | 1.977                 | 0.77777                       |
| 145       | 150       | -40.001             | 2.3736                 | 3.0369                                        | 935.6                            | 2.221                 | 0.78159                       |
| 145       | 150       | -45.001             | 2.7297                 | 3.4754                                        | 919.2                            | 2.509                 | 0.78542                       |
| 145       | 150       | -50.000             | 3.1709                 | 4.0177                                        | 899.7                            | 2.853                 | 0.78924                       |
| 145       | 150       | -55.001             | 3.7251                 | 4.6971                                        | 876.4                            | 3.265                 | 0.79305                       |
| 145       | 150       | -60.000             | 4.4281                 | 5.5574                                        | 848.6                            | 3.758                 | 0.79680                       |
| 150       | 155       | 40.000              | 0.5737                 | 0.7949                                        | 1028                             | 0.590                 | 0.72174                       |
| 150       | 155       | 29.999              | 0.6545                 | 0.8968                                        | 1023                             | 0.670                 | 0.72984                       |
| 150       | 155       | 24.999              | 0.7001                 | 0.9543                                        | 1020                             | 0.714                 | 0.73366                       |
| 150       | 155       | 19.999              | 0.7521                 | 1.0197                                        | 1017                             | 0.765                 | 0.73758                       |
| 150       | 155       | 15.000              | 0.8087                 | 1.0906                                        | 1014                             | 0.820                 | 0.74146                       |
| 150       | 155       | 9.999               | 0.8730                 | 1.1713                                        | 1009                             | 0.881                 | 0.74533                       |

| IBP | FBP | Cell Temp. | Dyn. Visc. | Kin. Visc.                      | Shear Rate      | Shear Stress | Density            |
|-----|-----|------------|------------|---------------------------------|-----------------|--------------|--------------------|
| °C  | °C  | °C         | mPa s      | mm <sup>2</sup> s <sup>-1</sup> | s <sup>-1</sup> | Pa           | g cm <sup>-3</sup> |
| 150 | 155 | -0.001     | 1.0267     | 1.3635                          | 1000            | 1.027        | 0.75298            |
| 150 | 155 | -5.001     | 1.1537     | 1.5247                          | 994.6           | 1.148        | 0.75673            |
| 150 | 155 | -10.001    | 1.2748     | 1.6761                          | 988.0           | 1.260        | 0.76059            |
| 150 | 155 | -15.001    | 1.4138     | 1.8496                          | 980.7           | 1.387        | 0.76438            |
| 150 | 155 | -20.001    | 1.5749     | 2.0502                          | 972.3           | 1.531        | 0.76816            |
| 150 | 155 | -25.001    | 1.7634     | 2.2843                          | 962.9           | 1.698        | 0.77196            |
| 150 | 155 | -30.001    | 1.9857     | 2.5596                          | 951.8           | 1.890        | 0.77576            |
| 150 | 155 | -35.001    | 2.2537     | 2.8910                          | 938.8           | 2.116        | 0.77956            |
| 150 | 155 | -40.001    | 2.5818     | 3.2958                          | 923.1           | 2.383        | 0.78337            |
| 150 | 155 | -45.000    | 2.9881     | 3.7959                          | 904.9           | 2.704        | 0.78717            |
| 150 | 155 | -50.001    | 3.4958     | 4.4196                          | 882.9           | 3.086        | 0.79097            |
| 150 | 155 | -55.000    | 4.1375     | 5.2059                          | 856.7           | 3.545        | 0.79477            |
| 150 | 155 | -60.001    | 4.9699     | 6.2241                          | 825.0           | 4.100        | 0.79850            |
| 155 | 160 | 59.999     | 0.4984     | 0.7022                          | 1031            | 0.514        | 0.70976            |
| 155 | 160 | 39.998     | 0.6286     | 0.8660                          | 1023            | 0.643        | 0.72579            |
| 155 | 160 | 29.998     | 0.7175     | 0.9780                          | 1017            | 0.730        | 0.73362            |
| 155 | 160 | 24.998     | 0.7690     | 1.0429                          | 1014            | 0.780        | 0.73735            |
| 155 | 160 | 19.998     | 0.8258     | 1.1143                          | 1010            | 0.834        | 0.74116            |
| 155 | 160 | 14.999     | 0.8895     | 1.1939                          | 1006            | 0.895        | 0.74499            |
| 155 | 160 | 10.000     | 0.9614     | 1.2839                          | 1002            | 0.963        | 0.74882            |
| 155 | 160 | -0.002     | 1.1353     | 1.5008                          | 991.3           | 1.125        | 0.75647            |
| 155 | 160 | -5.000     | 1.2762     | 1.6787                          | 985.0           | 1.257        | 0.76022            |
| 155 | 160 | -10.001    | 1.4099     | 1.8454                          | 977.8           | 1.379        | 0.76399            |
| 155 | 160 | -15.001    | 1.5647     | 2.0379                          | 969.8           | 1.517        | 0.76777            |
| 155 | 160 | -20.000    | 1.7489     | 2.2669                          | 960.2           | 1.679        | 0.77149            |
| 155 | 160 | -25.001    | 1.9947     | 2.5730                          | 947.5           | 1.890        | 0.77522            |
| 155 | 160 | -30.001    | 2.2554     | 2.8952                          | 934.7           | 2.108        | 0.77902            |
| 155 | 160 | -35.000    | 2.5769     | 3.2918                          | 919.4           | 2.369        | 0.78281            |
| 155 | 160 | -40.002    | 2.9838     | 3.7934                          | 901.6           | 2.690        | 0.78659            |
| 155 | 160 | -45.001    | 3.4748     | 4.3966                          | 879.2           | 3.055        | 0.79035            |
| 155 | 160 | -50.001    | 4.1119     | 5.1777                          | 852.8           | 3.507        | 0.79415            |
| 155 | 160 | -55.001    | 4.9403     | 6.1914                          | 820.8           | 4.055        | 0.79793            |
| 155 | 160 | -60.001    | 6.0502     | 7.5473                          | 781.7           | 4.729        | 0.80164            |
| 160 | 165 | 60.000     | 0.5002     | 0.7016                          | 1031            | 0.516        | 0.71294            |
| 160 | 165 | 39.999     | 0.6387     | 0.8763                          | 1022            | 0.653        | 0.72886            |
| 160 | 165 | 29.999     | 0.7322     | 0.9940                          | 1016            | 0.744        | 0.73663            |
| 160 | 165 | 24.999     | 0.7879     | 1.0643                          | 1012            | 0.797        | 0.74031            |
| 160 | 165 | 19.999     | 0.8494     | 1.1415                          | 1008            | 0.856        | 0.74410            |
| 160 | 165 | 14.999     | 0.9185     | 1.2281                          | 1004            | 0.922        | 0.74790            |
| 160 | 165 | 10.000     | 0.9966     | 1.3258                          | 998.7           | 0.995        | 0.75170            |
| 160 | 165 | -0.001     | 1.1868     | 1.5629                          | 987.1           | 1.171        | 0.75930            |
| 160 | 165 | -5.001     | 1.3371     | 1.7524                          | 980.2           | 1.311        | 0.76303            |
| 160 | 165 | -10.001    | 1.4798     | 1.9300                          | 972.4           | 1.439        | 0.76678            |
| 160 | 165 | -15.001    | 1.6529     | 2.1455                          | 963.5           | 1.593        | 0.77041            |
| 160 | 165 | -20.000    | 1.8622     | 2.4058                          | 952.5           | 1.774        | 0.77404            |
| 160 | 165 | -25.001    | 2.1039     | 2.7044                          | 940.3           | 1.978        | 0.77796            |
| 160 | 165 | -30.001    | 2.3976     | 3.0670                          | 926.0           | 2.220        | 0.78173            |

| IBP | FBP | Cell Temp. | Dyn. Visc. | Kin. Visc.                      | Shear Rate      | Shear Stress | Density            |
|-----|-----|------------|------------|---------------------------------|-----------------|--------------|--------------------|
| °C  | °C  | °C         | mPa s      | mm <sup>2</sup> s <sup>-1</sup> | s <sup>-1</sup> | Pa           | g cm <sup>-3</sup> |
| 160 | 165 | -35.000    | 2.7555     | 3.5080                          | 909.1           | 2.505        | 0.78549            |
| 160 | 165 | -40.000    | 3.2184     | 4.0778                          | 888.8           | 2.861        | 0.78925            |
| 160 | 165 | -45.000    | 3.7669     | 4.7502                          | 864.4           | 3.256        | 0.79301            |
| 160 | 165 | -50.001    | 4.4992     | 5.6467                          | 834.9           | 3.756        | 0.79678            |
| 160 | 165 | -55.001    | 5.4654     | 6.8271                          | 798.9           | 4.366        | 0.80054            |
| 160 | 165 | -60.000    | 6.7791     | 8.4293                          | 754.9           | 5.118        | 0.80423            |
| 165 | 170 | 60.000     | 0.5220     | 0.7299                          | 1029            | 0.537        | 0.71514            |
| 165 | 170 | 39.999     | 0.6667     | 0.9121                          | 1019            | 0.679        | 0.73097            |
| 165 | 170 | 29.999     | 0.7654     | 1.0360                          | 1012            | 0.775        | 0.73875            |
| 165 | 170 | 25.000     | 0.8244     | 1.1104                          | 1009            | 0.831        | 0.74240            |
| 165 | 170 | 19.999     | 0.8896     | 1.1923                          | 1004            | 0.893        | 0.74616            |
| 165 | 170 | 15.000     | 0.9633     | 1.2845                          | 999.6           | 0.963        | 0.74995            |
| 165 | 170 | 9.999      | 1.0468     | 1.3888                          | 994.4           | 1.041        | 0.75373            |
| 165 | 170 | -0.002     | 1.2508     | 1.6430                          | 982.0           | 1.228        | 0.76128            |
| 165 | 170 | -5.000     | 1.4130     | 1.8470                          | 974.6           | 1.377        | 0.76500            |
| 165 | 170 | -10.002    | 1.5705     | 2.0429                          | 966.0           | 1.517        | 0.76874            |
| 165 | 170 | -15.000    | 1.7560     | 2.2733                          | 956.2           | 1.679        | 0.77244            |
| 165 | 170 | -20.001    | 1.9791     | 2.5500                          | 944.8           | 1.870        | 0.77612            |
| 165 | 170 | -25.001    | 2.2452     | 2.8789                          | 931.3           | 2.091        | 0.77988            |
| 165 | 170 | -30.000    | 2.5670     | 3.2758                          | 915.7           | 2.351        | 0.78363            |
| 165 | 170 | -35.001    | 2.9639     | 3.7642                          | 897.3           | 2.660        | 0.78738            |
| 165 | 170 | -40.001    | 3.4792     | 4.3978                          | 875.2           | 3.045        | 0.79112            |
| 165 | 170 | -45.000    | 4.0966     | 5.1537                          | 848.4           | 3.476        | 0.79487            |
| 165 | 170 | -50.001    | 4.9269     | 6.1693                          | 815.9           | 4.020        | 0.79862            |
| 165 | 170 | -55.001    | 6.0375     | 7.5246                          | 776.4           | 4.687        | 0.80237            |
| 165 | 170 | -60.001    | 7.5691     | 9.3904                          | 727.9           | 5.510        | 0.80605            |
| 170 | 175 | 59.999     | 0.5474     | 0.7618                          | 1026            | 0.561        | 0.71859            |
| 170 | 175 | 39.999     | 0.7043     | 0.9591                          | 1015            | 0.715        | 0.73433            |
| 170 | 175 | 29.999     | 0.8115     | 1.0936                          | 1008            | 0.818        | 0.74201            |
| 170 | 175 | 25.000     | 0.8757     | 1.1744                          | 1004            | 0.879        | 0.74565            |
| 170 | 175 | 19.998     | 0.9470     | 1.2637                          | 999.1           | 0.946        | 0.74940            |
| 170 | 175 | 14.998     | 1.0270     | 1.3636                          | 994.0           | 1.021        | 0.75317            |
| 170 | 175 | 10.000     | 1.1190     | 1.4783                          | 988.3           | 1.106        | 0.75693            |
| 170 | 175 | -0.002     | 1.3448     | 1.7592                          | 974.7           | 1.311        | 0.76444            |
| 170 | 175 | -5.001     | 1.5164     | 1.9741                          | 966.9           | 1.466        | 0.76815            |
| 170 | 175 | -10.001    | 1.6942     | 2.1950                          | 957.0           | 1.621        | 0.77187            |
| 170 | 175 | -15.001    | 1.9017     | 2.4519                          | 946.2           | 1.799        | 0.77560            |
| 170 | 175 | -20.001    | 2.1490     | 2.7579                          | 933.6           | 2.006        | 0.77921            |
| 170 | 175 | -25.001    | 2.4510     | 3.1304                          | 918.5           | 2.251        | 0.78297            |
| 170 | 175 | -30.001    | 2.8164     | 3.5800                          | 901.1           | 2.538        | 0.78670            |
| 170 | 175 | -35.001    | 3.2691     | 4.1359                          | 880.5           | 2.879        | 0.79043            |
| 170 | 175 | -40.001    | 3.8650     | 4.8667                          | 855.5           | 3.307        | 0.79416            |
| 170 | 175 | -45.001    | 4.5858     | 5.7473                          | 825.6           | 3.786        | 0.79790            |
| 170 | 175 | -50.001    | 5.5661     | 6.9434                          | 789.2           | 4.393        | 0.80163            |
| 170 | 175 | -55.000    | 6.8924     | 8.5581                          | 744.9           | 5.134        | 0.80537            |
| 170 | 175 | -60.001    | 8.7487     | 10.814                          | 691.0           | 6.045        | 0.80903            |
| 175 | 180 | 60.000     | 0.5922     | 0.8182                          | 1021            | 0.604        | 0.72381            |

| IBP | FBP | Cell Temp. | Dyn. Visc. | Kin. Visc.                      | Shear Rate      | Shear Stress | Density            |
|-----|-----|------------|------------|---------------------------------|-----------------|--------------|--------------------|
| °C  | °C  | °C         | mPa s      | mm <sup>2</sup> s <sup>-1</sup> | s <sup>-1</sup> | Pa           | g cm <sup>-3</sup> |
| 175 | 180 | 39.998     | 0.7640     | 1.0333                          | 1009            | 0.771        | 0.73936            |
| 175 | 180 | 29.999     | 0.8837     | 1.1829                          | 1001            | 0.885        | 0.74700            |
| 175 | 180 | 24.999     | 0.9564     | 1.2742                          | 996.2           | 0.953        | 0.75063            |
| 175 | 180 | 19.999     | 1.0379     | 1.3759                          | 991.0           | 1.029        | 0.75435            |
| 175 | 180 | 14.999     | 1.1298     | 1.4903                          | 985.2           | 1.113        | 0.75809            |
| 175 | 180 | 9.999      | 1.2345     | 1.6204                          | 978.7           | 1.208        | 0.76183            |
| 175 | 180 | -0.002     | 1.4935     | 1.9414                          | 963.2           | 1.439        | 0.76929            |
| 175 | 180 | -5.000     | 1.6916     | 2.1885                          | 953.8           | 1.613        | 0.77298            |
| 175 | 180 | -10.001    | 1.8953     | 2.4403                          | 942.8           | 1.787        | 0.77667            |
| 175 | 180 | -15.002    | 2.1396     | 2.7420                          | 930.2           | 1.990        | 0.78032            |
| 175 | 180 | -20.002    | 2.4352     | 3.1061                          | 915.4           | 2.229        | 0.78399            |
| 175 | 180 | -25.002    | 2.7929     | 3.5457                          | 898.0           | 2.508        | 0.78770            |
| 175 | 180 | -30.001    | 3.2370     | 4.0902                          | 877.4           | 2.840        | 0.79139            |
| 175 | 180 | -35.001    | 3.7947     | 4.7726                          | 853.0           | 3.237        | 0.79510            |
| 175 | 180 | -40.001    | 4.5360     | 5.6785                          | 823.6           | 3.736        | 0.79881            |
| 175 | 180 | -45.001    | 5.4528     | 6.7945                          | 788.0           | 4.297        | 0.80253            |
| 175 | 180 | -50.001    | 6.7420     | 8.3622                          | 744.2           | 5.017        | 0.80624            |
| 175 | 180 | -55.001    | 8.5035     | 10.499                          | 692.0           | 5.884        | 0.80995            |
| 175 | 180 | -60.001    | 11.021     | 13.547                          | 629.4           | 6.937        | 0.81358            |
| 180 | 185 | 60.000     | 0.6132     | 0.8443                          | 1018            | 0.624        | 0.72628            |
| 180 | 185 | 39.998     | 0.7961     | 1.0734                          | 1006            | 0.801        | 0.74170            |
| 180 | 185 | 29.998     | 0.9228     | 1.2314                          | 997.3           | 0.920        | 0.74935            |
| 180 | 185 | 24.999     | 0.9994     | 1.3274                          | 992.3           | 0.992        | 0.75292            |
| 180 | 185 | 20.000     | 1.0854     | 1.4345                          | 986.8           | 1.071        | 0.75661            |
| 180 | 185 | 14.999     | 1.1833     | 1.5563                          | 980.6           | 1.160        | 0.76034            |
| 180 | 185 | 9.999      | 1.2957     | 1.6959                          | 973.7           | 1.262        | 0.76406            |
| 180 | 185 | -0.002     | 1.5764     | 2.0433                          | 956.9           | 1.509        | 0.77149            |
| 180 | 185 | -5.001     | 1.7904     | 2.3098                          | 946.6           | 1.695        | 0.77516            |
| 180 | 185 | -10.000    | 2.0110     | 2.5820                          | 934.9           | 1.880        | 0.77884            |
| 180 | 185 | -15.001    | 2.2773     | 2.9103                          | 921.2           | 2.098        | 0.78248            |
| 180 | 185 | -20.001    | 2.5989     | 3.3058                          | 905.2           | 2.353        | 0.78615            |
| 180 | 185 | -25.002    | 2.9930     | 3.7894                          | 886.2           | 2.653        | 0.78983            |
| 180 | 185 | -30.002    | 3.4856     | 4.3925                          | 864.1           | 3.012        | 0.79353            |
| 180 | 185 | -35.001    | 4.1076     | 5.1524                          | 837.4           | 3.440        | 0.79722            |
| 180 | 185 | -40.001    | 4.9396     | 6.1674                          | 805.4           | 3.979        | 0.80092            |
| 180 | 185 | -45.001    | 5.9800     | 7.4320                          | 766.8           | 4.585        | 0.80463            |
| 180 | 185 | -50.001    | 7.4308     | 9.1928                          | 720.1           | 5.351        | 0.80833            |
| 180 | 185 | -55.001    | 9.4594     | 11.649                          | 664.0           | 6.281        | 0.81203            |
| 180 | 185 | -60.001    | 12.400     | 15.202                          | 597.1           | 7.404        | 0.81567            |
| 185 | 190 | 60.002     | 0.6368     | 0.8734                          | 1013            | 0.645        | 0.72905            |
| 185 | 190 | 39.999     | 0.8380     | 1.1262                          | 1001            | 0.839        | 0.74409            |
| 185 | 190 | 30.000     | 0.9756     | 1.2978                          | 993.8           | 0.970        | 0.75170            |
| 185 | 190 | 25.000     | 1.0568     | 1.3988                          | 987.1           | 1.043        | 0.75550            |
| 185 | 190 | 20.000     | 1.1514     | 1.5170                          | 981.1           | 1.130        | 0.75901            |
| 185 | 190 | 15.000     | 1.2569     | 1.6474                          | 974.5           | 1.225        | 0.76294            |
| 185 | 190 | 10.000     | 1.3790     | 1.7987                          | 967.0           | 1.333        | 0.76668            |
| 185 | 190 | -0.001     | 1.6846     | 2.1763                          | 948.9           | 1.599        | 0.77409            |

| IBP | FBP | Cell Temp. | Dyn. Visc. | Kin. Visc.                      | Shear Rate      | Shear Stress | Density            |
|-----|-----|------------|------------|---------------------------------|-----------------|--------------|--------------------|
| °C  | °C  | °C         | mPa s      | mm <sup>2</sup> s <sup>-1</sup> | s <sup>-1</sup> | Pa           | g cm <sup>-3</sup> |
| 185 | 190 | -5.002     | 1.9182     | 2.4664                          | 937.6           | 1.798        | 0.77773            |
| 185 | 190 | -10.001    | 2.1632     | 2.7684                          | 924.7           | 2.000        | 0.78140            |
| 185 | 190 | -15.002    | 2.4592     | 3.1326                          | 909.6           | 2.237        | 0.78503            |
| 185 | 190 | -20.001    | 2.8212     | 3.5771                          | 891.8           | 2.516        | 0.78867            |
| 185 | 190 | -25.001    | 3.2639     | 4.1193                          | 871.2           | 2.844        | 0.79233            |
| 185 | 190 | -30.001    | 3.8221     | 4.8018                          | 846.5           | 3.235        | 0.79598            |
| 185 | 190 | -35.002    | 4.5354     | 5.6719                          | 817.0           | 3.706        | 0.79963            |
| 185 | 190 | -40.001    | 5.4976     | 6.8438                          | 781.6           | 4.297        | 0.80330            |
| 185 | 190 | -45.001    | 6.7170     | 8.3235                          | 739.0           | 4.964        | 0.80699            |
| 185 | 190 | -50.000    | 8.4353     | 10.405                          | 687.7           | 5.801        | 0.81067            |
| 185 | 190 | -55.001    | 10.868     | 13.345                          | 626.6           | 6.810        | 0.81435            |
| 185 | 190 | -60.001    | 14.442     | 17.656                          | 554.9           | 8.014        | 0.81797            |
| 190 | 195 | 60.001     | 0.6732     | 0.9205                          | 1012            | 0.681        | 0.73129            |
| 190 | 195 | 39.998     | 0.8822     | 1.1817                          | 997.3           | 0.880        | 0.74655            |
| 190 | 195 | 29.998     | 1.0289     | 1.3643                          | 987.4           | 1.016        | 0.75413            |
| 190 | 195 | 24.998     | 1.1182     | 1.4758                          | 981.7           | 1.098        | 0.75768            |
| 190 | 195 | 19.999     | 1.2192     | 1.6013                          | 975.3           | 1.189        | 0.76137            |
| 190 | 195 | 14.999     | 1.3348     | 1.7446                          | 968.1           | 1.292        | 0.76509            |
| 190 | 195 | 9.998      | 1.4689     | 1.9106                          | 959.9           | 1.410        | 0.76878            |
| 190 | 195 | -0.002     | 1.8078     | 2.3293                          | 940.0           | 1.699        | 0.77613            |
| 190 | 195 | -5.001     | 2.0599     | 2.6417                          | 927.8           | 1.911        | 0.77977            |
| 190 | 195 | -10.001    | 2.3301     | 2.9743                          | 913.8           | 2.129        | 0.78342            |
| 190 | 195 | -15.002    | 2.6599     | 3.3797                          | 897.2           | 2.386        | 0.78700            |
| 190 | 195 | -20.002    | 3.0635     | 3.8747                          | 877.8           | 2.689        | 0.79065            |
| 190 | 195 | -25.001    | 3.5644     | 4.4874                          | 854.9           | 3.047        | 0.79431            |
| 190 | 195 | -30.002    | 4.2001     | 5.2635                          | 827.7           | 3.476        | 0.79797            |
| 190 | 195 | -35.001    | 5.0174     | 6.2590                          | 795.2           | 3.990        | 0.80164            |
| 190 | 195 | -40.001    | 6.1309     | 7.6130                          | 756.2           | 4.636        | 0.80531            |
| 190 | 195 | -45.001    | 7.5608     | 9.3459                          | 709.5           | 5.365        | 0.80899            |
| 190 | 195 | -50.002    | 9.5972     | 11.810                          | 653.6           | 6.273        | 0.81267            |
| 190 | 195 | -55.000    | 12.519     | 15.336                          | 587.8           | 7.359        | 0.81634            |
| 190 | 195 | -60.002    | 16.899     | 20.609                          | 511.5           | 8.643        | 0.81995            |
| 195 | 200 | 60.001     | 0.7063     | 0.9626                          | 1008            | 0.712        | 0.73368            |
| 195 | 200 | 39.998     | 0.9302     | 1.2420                          | 992.6           | 0.923        | 0.74896            |
| 195 | 200 | 29.999     | 1.0881     | 1.4384                          | 982.1           | 1.069        | 0.75648            |
| 195 | 200 | 25.000     | 1.1848     | 1.5589                          | 975.9           | 1.156        | 0.76003            |
| 195 | 200 | 20.000     | 1.2945     | 1.6951                          | 968.9           | 1.254        | 0.76367            |
| 195 | 200 | 14.999     | 1.4207     | 1.8514                          | 961.0           | 1.365        | 0.76735            |
| 195 | 200 | 9.999      | 1.5670     | 2.0324                          | 952.2           | 1.492        | 0.77102            |
| 195 | 200 | -0.002     | 1.9405     | 2.4931                          | 930.5           | 1.806        | 0.77835            |
| 195 | 200 | -5.002     | 2.2160     | 2.8339                          | 917.2           | 2.033        | 0.78198            |
| 195 | 200 | -10.000    | 2.5165     | 3.2033                          | 901.7           | 2.269        | 0.78561            |
| 195 | 200 | -15.001    | 2.8831     | 3.6529                          | 883.6           | 2.548        | 0.78927            |
| 195 | 200 | -20.001    | 3.3389     | 4.2113                          | 862.3           | 2.879        | 0.79284            |
| 195 | 200 | -25.001    | 3.9063     | 4.9045                          | 837.1           | 3.270        | 0.79647            |
| 195 | 200 | -30.001    | 4.6330     | 5.7904                          | 807.1           | 3.739        | 0.80012            |
| 195 | 200 | -35.001    | 5.5739     | 6.9345                          | 771.5           | 4.300        | 0.80378            |

| IBP  | FBP | Cell Temp. | Dyn. Visc. | Kin. Visc.                      | Shear Rate      | Shear Stress | Density            |
|------|-----|------------|------------|---------------------------------|-----------------|--------------|--------------------|
| °C   | °C  | °C         | mPa s      | mm <sup>2</sup> s <sup>-1</sup> | s <sup>-1</sup> | Pa           | g cm <sup>-3</sup> |
| 195  | 200 | -40.001    | 6.8695     | 8.5077                          | 728.7           | 5.006        | 0.80744            |
| 195  | 200 | -45.001    | 8.5546     | 10.547                          | 677.6           | 5.797        | 0.81111            |
| 195  | 200 | -50.001    | 10.991     | 13.490                          | 617.0           | 6.781        | 0.81478            |
| 195  | 200 | -55.001    | 14.528     | 17.751                          | 546.7           | 7.942        | 0.81844            |
| s195 | 200 | -60.001    | 19.874     | 24.176                          | 467.1           | 9.284        | 0.82204            |
| 200  | 205 | 60.000     | 0.7668     | 1.0416                          | 1002            | 0.768        | 0.73618            |
| 200  | 205 | 39.999     | 1.0194     | 1.3563                          | 984.0           | 1.003        | 0.75158            |
| 200  | 205 | 29.998     | 1.2009     | 1.5817                          | 972.1           | 1.167        | 0.75922            |
| 200  | 205 | 24.998     | 1.3099     | 1.7174                          | 965.2           | 1.264        | 0.76273            |
| 200  | 205 | 19.999     | 1.4339     | 1.8711                          | 957.4           | 1.373        | 0.76636            |
| 200  | 205 | 14.999     | 1.5784     | 2.0498                          | 948.6           | 1.497        | 0.77001            |
| 200  | 205 | 9.999      | 1.7436     | 2.2536                          | 938.7           | 1.637        | 0.77367            |
| 200  | 205 | -0.001     | 2.1697     | 2.7783                          | 914.7           | 1.985        | 0.78095            |
| 200  | 205 | -5.001     | 2.4839     | 3.1660                          | 899.6           | 2.235        | 0.78456            |
| 200  | 205 | -10.000    | 2.8336     | 3.5952                          | 882.1           | 2.500        | 0.78818            |
| 200  | 205 | -15.001    | 3.2625     | 4.1203                          | 861.7           | 2.811        | 0.79181            |
| 200  | 205 | -20.000    | 3.7989     | 4.7763                          | 837.6           | 3.182        | 0.79537            |
| 200  | 205 | -25.000    | 4.4666     | 5.5921                          | 809.4           | 3.615        | 0.79873            |
| 200  | 205 | -30.001    | 5.3224     | 6.6320                          | 776.3           | 4.132        | 0.80253            |
| 200  | 205 | -35.000    | 6.4578     | 8.0120                          | 736.5           | 4.756        | 0.80601            |
| 200  | 205 | -40.000    | 8.0399     | 9.9302                          | 688.8           | 5.538        | 0.80965            |
| 205  | 210 | 60.003     | 0.7641     | 1.0320                          | 1002            | 0.765        | 0.74044            |
| 205  | 210 | 39.999     | 1.0139     | 1.3417                          | 985.7           | 0.999        | 0.75566            |
| 205  | 210 | 29.999     | 1.1916     | 1.5613                          | 972.8           | 1.159        | 0.76323            |
| 205  | 210 | 25.000     | 1.2992     | 1.6944                          | 965.9           | 1.255        | 0.76677            |
| 205  | 210 | 20.001     | 1.4222     | 1.8460                          | 958.1           | 1.363        | 0.77040            |
| 205  | 210 | 15.000     | 1.5679     | 2.0256                          | 949.1           | 1.488        | 0.77406            |
| 205  | 210 | 9.999      | 1.7358     | 2.2319                          | 939.1           | 1.630        | 0.77772            |
| 205  | 210 | -0.001     | 2.1663     | 2.7596                          | 914.9           | 1.982        | 0.78502            |
| 205  | 210 | -5.002     | 2.4877     | 3.1545                          | 899.0           | 2.237        | 0.78864            |
| 205  | 210 | -10.001    | 2.8454     | 3.5917                          | 881.3           | 2.508        | 0.79222            |
| 205  | 210 | -15.001    | 3.2824     | 4.1245                          | 860.4           | 2.824        | 0.79583            |
| 205  | 210 | -20.003    | 3.8314     | 4.7926                          | 835.7           | 3.202        | 0.79945            |
| 205  | 210 | -25.001    | 4.5232     | 5.6324                          | 806.6           | 3.649        | 0.80307            |
| 205  | 210 | -30.001    | 5.4232     | 6.7228                          | 771.9           | 4.186        | 0.80669            |
| 205  | 210 | -35.001    | 6.6054     | 8.1515                          | 730.8           | 4.827        | 0.81034            |
| 205  | 210 | -40.002    | 8.2540     | 10.140                          | 681.9           | 5.629        | 0.81399            |
| 205  | 210 | -45.001    | 10.445     | 12.775                          | 624.2           | 6.520        | 0.81764            |
| 205  | 210 | -50.000    | 13.659     | 16.631                          | 557.1           | 7.609        | 0.82130            |
| 205  | 210 | -55.001    | 18.437     | 22.349                          | 481.1           | 8.869        | 0.82495            |
| 210  | 215 | 60.003     | 0.8186     | 1.1041                          | 995.9           | 0.815        | 0.74140            |
| 210  | 215 | 40.000     | 1.0898     | 1.4414                          | 977.5           | 1.065        | 0.75610            |
| 210  | 215 | 29.999     | 1.2875     | 1.6863                          | 964.5           | 1.242        | 0.76350            |
| 210  | 215 | 25.001     | 1.4060     | 1.8323                          | 957.0           | 1.346        | 0.76733            |
| 210  | 215 | 20.000     | 1.5450     | 2.0039                          | 948.4           | 1.465        | 0.77099            |
| 210  | 215 | 15.000     | 1.7044     | 2.2003                          | 938.6           | 1.600        | 0.77463            |
| 210  | 215 | 9.998      | 1.8945     | 2.4343                          | 927.5           | 1.757        | 0.77827            |



| IBP | FBP | Cell Temp. | Dyn. Visc. | Kin. Visc.                      | Shear Rate      | Shear Stress | Density            |
|-----|-----|------------|------------|---------------------------------|-----------------|--------------|--------------------|
| °C  | °C  | °C         | mPa s      | mm <sup>2</sup> s <sup>-1</sup> | s <sup>-1</sup> | Pa           | g cm <sup>-3</sup> |
| 210 | 215 | -0.001     | 2.3840     | 3.0356                          | 900.2           | 2.146        | 0.78535            |
| 210 | 215 | -5.000     | 2.7403     | 3.4726                          | 883.3           | 2.421        | 0.78910            |
| 210 | 215 | -10.001    | 3.1460     | 3.9688                          | 863.5           | 2.717        | 0.79269            |
| 210 | 215 | -15.001    | 3.6491     | 4.5823                          | 840.3           | 3.066        | 0.79634            |
| 210 | 215 | -20.002    | 4.2842     | 5.3559                          | 812.9           | 3.483        | 0.79990            |
| 210 | 215 | -25.001    | 5.0955     | 6.3416                          | 780.5           | 3.977        | 0.80351            |
| 215 | 220 | 60.001     | 0.8307     | 1.1189                          | 994.7           | 0.826        | 0.74239            |
| 215 | 220 | 39.999     | 1.1179     | 1.4765                          | 974.8           | 1.090        | 0.75712            |
| 215 | 220 | 29.999     | 1.3243     | 1.7329                          | 961.3           | 1.273        | 0.76419            |
| 215 | 220 | 24.998     | 1.4511     | 1.8899                          | 953.3           | 1.383        | 0.76786            |
| 215 | 220 | 20.000     | 1.5987     | 2.0727                          | 944.0           | 1.509        | 0.77133            |
| 215 | 220 | 14.999     | 1.7698     | 2.2841                          | 933.9           | 1.653        | 0.77484            |
| 215 | 220 | 10.000     | 1.9698     | 2.5306                          | 922.1           | 1.816        | 0.77841            |
| 215 | 220 | -0.001     | 2.4939     | 3.1751                          | 893.1           | 2.227        | 0.78546            |
| 215 | 220 | -5.001     | 2.8766     | 3.6458                          | 874.9           | 2.517        | 0.78903            |
| 215 | 220 | -10.001    | 3.3153     | 4.1832                          | 853.9           | 2.831        | 0.79252            |
| 215 | 220 | -15.001    | 3.8632     | 4.8540                          | 829.0           | 3.203        | 0.79587            |
| 215 | 220 | -20.002    | 4.5655     | 5.7077                          | 799.6           | 3.651        | 0.79989            |
| 215 | 220 | -25.001    | 5.4487     | 6.7803                          | 765.1           | 4.169        | 0.80361            |
| 215 | 220 | -30.001    | 6.6210     | 8.2025                          | 724.2           | 4.795        | 0.80720            |
| 215 | 220 | -35.001    | 8.1967     | 10.109                          | 676.0           | 5.541        | 0.81080            |
| 215 | 220 | -40.001    | 10.564     | 12.971                          | 619.4           | 6.543        | 0.81440            |
| 215 | 220 | -45.002    | 13.486     | 16.486                          | 554.0           | 7.471        | 0.81803            |
| 215 | 220 | -50.001    | 18.052     | 21.971                          | 480.3           | 8.671        | 0.82165            |
| 215 | 220 | -55.000    | 24.973     | 30.260                          | 400.6           | 10.00        | 0.82529            |
| 220 | 225 | 60.000     | 0.8725     | 1.1731                          | 990.1           | 0.864        | 0.74375            |
| 220 | 225 | 39.998     | 1.1796     | 1.5552                          | 969.2           | 1.143        | 0.75852            |
| 220 | 225 | 29.999     | 1.4032     | 1.8317                          | 954.6           | 1.339        | 0.76604            |
| 220 | 225 | 24.999     | 1.5424     | 2.0047                          | 945.9           | 1.459        | 0.76940            |
| 220 | 225 | 19.999     | 1.7036     | 2.2037                          | 935.8           | 1.594        | 0.77305            |
| 220 | 225 | 14.999     | 1.8915     | 2.4355                          | 924.6           | 1.749        | 0.77666            |
| 220 | 225 | 9.999      | 2.1135     | 2.7087                          | 911.8           | 1.927        | 0.78026            |
| 220 | 225 | -0.001     | 2.6945     | 3.4218                          | 880.2           | 2.372        | 0.78746            |
| 220 | 225 | -5.000     | 3.1184     | 3.9423                          | 860.5           | 2.683        | 0.79101            |
| 220 | 225 | -10.001    | 3.6109     | 4.5444                          | 837.4           | 3.024        | 0.79458            |
| 220 | 225 | -15.001    | 4.2300     | 5.3000                          | 810.3           | 3.427        | 0.79811            |
| 220 | 225 | -20.002    | 5.0274     | 6.2712                          | 778.3           | 3.913        | 0.80168            |
| 220 | 225 | -25.002    | 6.0432     | 7.5046                          | 740.5           | 4.475        | 0.80526            |
| 220 | 225 | -30.001    | 7.4062     | 9.1565                          | 695.9           | 5.154        | 0.80885            |
| 220 | 225 | -35.001    | 9.2600     | 11.398                          | 643.7           | 5.960        | 0.81245            |
| 220 | 225 | -40.001    | 12.066     | 14.785                          | 583.0           | 7.034        | 0.81606            |
| 220 | 225 | -45.000    | 15.591     | 19.021                          | 513.9           | 8.013        | 0.81967            |
| 220 | 225 | -50.001    | 21.158     | 25.699                          | 437.6           | 9.260        | 0.82329            |
| 220 | 225 | -55.000    | 29.735     | 35.959                          | 357.1           | 10.62        | 0.82691            |
| 225 | 230 | 60.002     | 0.9179     | 1.2326                          | 985.6           | 0.905        | 0.74466            |
| 225 | 230 | 40.000     | 1.2465     | 1.6410                          | 963.1           | 1.201        | 0.75957            |
| 225 | 230 | 29.999     | 1.4894     | 1.9423                          | 947.4           | 1.411        | 0.76679            |

| IBP | FBP | Cell Temp. | Dyn. Visc. | Kin. Visc.                      | Shear Rate      | Shear Stress | Density            |
|-----|-----|------------|------------|---------------------------------|-----------------|--------------|--------------------|
| °C  | °C  | °C         | mPa s      | mm <sup>2</sup> s <sup>-1</sup> | s <sup>-1</sup> | Pa           | g cm <sup>-3</sup> |
| 225 | 230 | 25.000     | 1.6412     | 2.1301                          | 937.8           | 1.539        | 0.77048            |
| 225 | 230 | 20.000     | 1.8175     | 2.3479                          | 927.0           | 1.685        | 0.77410            |
| 225 | 230 | 14.999     | 2.0244     | 2.6031                          | 914.8           | 1.852        | 0.77769            |
| 225 | 230 | 9.999      | 2.2681     | 2.9031                          | 901.0           | 2.044        | 0.78128            |
| 225 | 230 | -0.001     | 2.9134     | 3.6949                          | 866.6           | 2.525        | 0.78848            |
| 225 | 230 | -5.001     | 3.3847     | 4.2737                          | 845.0           | 2.860        | 0.79200            |
| 225 | 230 | -10.001    | 3.9400     | 4.9525                          | 819.8           | 3.230        | 0.79555            |
| 225 | 230 | -15.000    | 4.6391     | 5.8053                          | 790.2           | 3.666        | 0.79912            |
| 225 | 230 | -20.000    | 5.5509     | 6.9159                          | 755.3           | 4.193        | 0.80263            |
| 225 | 230 | -25.001    | 6.7211     | 8.3369                          | 714.3           | 4.801        | 0.80619            |
| 225 | 230 | -30.000    | 8.3037     | 10.254                          | 666.2           | 5.532        | 0.80977            |
| 225 | 230 | -35.001    | 10.482     | 12.888                          | 610.1           | 6.396        | 0.81335            |
| 225 | 230 | -40.001    | 13.802     | 16.895                          | 545.9           | 7.534        | 0.81695            |
| 225 | 230 | -45.001    | 18.047     | 21.994                          | 473.9           | 8.553        | 0.82055            |
| 225 | 230 | -50.000    | 24.816     | 30.111                          | 396.2           | 9.831        | 0.82415            |
| 230 | 235 | 60.002     | 0.9730     | 1.3046                          | 980.0           | 0.953        | 0.74584            |
| 230 | 235 | 40.000     | 1.3323     | 1.7522                          | 955.5           | 1.273        | 0.76031            |
| 230 | 235 | 29.999     | 1.6007     | 2.0863                          | 938.2           | 1.502        | 0.76727            |
| 230 | 235 | 24.999     | 1.7678     | 2.2934                          | 927.8           | 1.640        | 0.77085            |
| 230 | 235 | 19.999     | 1.9618     | 2.5335                          | 916.2           | 1.797        | 0.77435            |
| 230 | 235 | 14.999     | 2.1917     | 2.8179                          | 902.8           | 1.979        | 0.77778            |
| 230 | 235 | 9.999      | 2.4697     | 3.1613                          | 887.4           | 2.192        | 0.78123            |
| 230 | 235 | -0.002     | 3.2032     | 4.0640                          | 849.4           | 2.721        | 0.78820            |
| 230 | 235 | -5.001     | 3.7392     | 4.7234                          | 825.5           | 3.087        | 0.79163            |
| 230 | 235 | -10.001    | 4.3783     | 5.5067                          | 797.5           | 3.492        | 0.79507            |
| 230 | 235 | -15.001    | 5.1918     | 6.5016                          | 764.8           | 3.971        | 0.79855            |
| 230 | 235 | -20.002    | 6.2602     | 7.8059                          | 726.4           | 4.547        | 0.80198            |
| 230 | 235 | -25.001    | 7.6487     | 9.4962                          | 681.4           | 5.212        | 0.80545            |
| 230 | 235 | -30.000    | 9.5471     | 11.802                          | 629.0           | 6.005        | 0.80895            |
| 230 | 235 | -35.001    | 12.187     | 14.999                          | 568.8           | 6.932        | 0.81248            |
| 230 | 235 | -40.001    | 16.252     | 19.915                          | 500.9           | 8.140        | 0.81604            |
| 230 | 235 | -45.001    | 21.551     | 26.294                          | 426.5           | 9.192        | 0.81963            |
| 230 | 235 | -50.001    | 30.091     | 36.551                          | 348.5           | 10.49        | 0.82326            |
| 235 | 240 | 60.001     | 1.0203     | 1.3663                          | 975.2           | 0.995        | 0.74674            |
| 235 | 240 | 39.997     | 1.4086     | 1.8507                          | 948.8           | 1.337        | 0.76114            |
| 235 | 240 | 29.997     | 1.7002     | 2.2128                          | 930.2           | 1.581        | 0.76832            |
| 235 | 240 | 24.998     | 1.8838     | 2.4403                          | 918.9           | 1.731        | 0.77197            |
| 235 | 240 | 19.999     | 2.0986     | 2.7059                          | 906.1           | 1.902        | 0.77554            |
| 235 | 240 | 14.998     | 2.3529     | 3.0201                          | 891.7           | 2.098        | 0.77909            |
| 235 | 240 | 9.999      | 2.6576     | 3.3957                          | 875.0           | 2.325        | 0.78265            |
| 235 | 240 | -0.001     | 3.4742     | 4.3992                          | 834.1           | 2.898        | 0.78974            |
| 235 | 240 | -5.001     | 4.0717     | 5.1329                          | 807.8           | 3.289        | 0.79326            |
| 235 | 240 | -10.002    | 4.7922     | 6.0144                          | 777.6           | 3.726        | 0.79678            |
| 235 | 240 | -15.002    | 5.7153     | 7.1412                          | 742.2           | 4.242        | 0.80033            |
| 235 | 240 | -20.002    | 6.9390     | 8.6327                          | 700.6           | 4.862        | 0.80380            |
| 235 | 240 | -25.002    | 8.5413     | 10.580                          | 652.4           | 5.572        | 0.80733            |
| 235 | 240 | -30.001    | 10.756     | 13.264                          | 596.5           | 6.416        | 0.81088            |

| IBP | FBP | Cell Temp. | Dyn. Visc. | Kin. Visc.                      | Shear Rate      | Shear Stress | Density            |
|-----|-----|------------|------------|---------------------------------|-----------------|--------------|--------------------|
| °C  | °C  | °C         | mPa s      | mm <sup>2</sup> s <sup>-1</sup> | s <sup>-1</sup> | Pa           | g cm <sup>-3</sup> |
| 235 | 240 | -35.001    | 13.851     | 17.007                          | 533.4           | 7.388        | 0.81443            |
| 235 | 240 | -40.000    | 18.671     | 22.825                          | 463.1           | 8.646        | 0.81800            |
| 235 | 240 | -45.001    | 25.043     | 30.482                          | 387.8           | 9.713        | 0.82157            |
| 240 | 245 | 60.001     | 1.0809     | 1.4454                          | 969.1           | 1.048        | 0.74782            |
| 240 | 245 | 39.998     | 1.5006     | 1.9688                          | 940.8           | 1.412        | 0.76221            |
| 240 | 245 | 29.999     | 1.8193     | 2.3649                          | 920.7           | 1.675        | 0.76930            |
| 240 | 245 | 25.000     | 2.0214     | 2.6151                          | 908.4           | 1.836        | 0.77295            |
| 240 | 245 | 19.998     | 2.2597     | 2.9100                          | 894.6           | 2.021        | 0.77652            |
| 240 | 245 | 14.999     | 2.5426     | 3.2595                          | 878.8           | 2.234        | 0.78004            |
| 240 | 245 | 9.999      | 2.8834     | 3.6797                          | 860.6           | 2.481        | 0.78358            |
| 240 | 245 | -0.003     | 3.8069     | 4.8150                          | 815.4           | 3.104        | 0.79063            |
| 240 | 245 | -5.000     | 4.4829     | 5.6449                          | 787.0           | 3.528        | 0.79414            |
| 240 | 245 | -10.001    | 5.3076     | 6.6540                          | 754.0           | 4.002        | 0.79765            |
| 240 | 245 | -15.001    | 6.3756     | 7.9582                          | 715.4           | 4.561        | 0.80113            |
| 240 | 245 | -20.001    | 7.7972     | 9.6905                          | 670.5           | 5.228        | 0.80462            |
| 240 | 245 | -25.001    | 9.6809     | 11.979                          | 618.7           | 5.990        | 0.80814            |
| 240 | 245 | -30.000    | 12.317     | 15.175                          | 559.2           | 6.888        | 0.81167            |
| 240 | 245 | -35.002    | 16.040     | 19.675                          | 493.1           | 7.909        | 0.81521            |
| 240 | 245 | -40.001    | 21.866     | 26.706                          | 421.1           | 9.208        | 0.81876            |
| 240 | 245 | -45.001    | 29.704     | 36.122                          | 346.0           | 10.28        | 0.82232            |
| 245 | 250 | 60.003     | 1.1339     | 1.5144                          | 963.9           | 1.093        | 0.74874            |
| 245 | 250 | 39.999     | 1.5861     | 2.0782                          | 933.5           | 1.481        | 0.76320            |
| 245 | 250 | 29.999     | 1.9321     | 2.5083                          | 911.9           | 1.762        | 0.77029            |
| 245 | 250 | 24.999     | 2.1525     | 2.7814                          | 898.8           | 1.935        | 0.77390            |
| 245 | 250 | 19.999     | 2.4125     | 3.1029                          | 883.8           | 2.132        | 0.77749            |
| 245 | 250 | 14.999     | 2.7234     | 3.4870                          | 866.8           | 2.361        | 0.78101            |
| 245 | 250 | 9.998      | 3.0991     | 3.9502                          | 847.2           | 2.625        | 0.78453            |
| 245 | 250 | -0.002     | 4.1258     | 5.2123                          | 798.5           | 3.295        | 0.79154            |
| 245 | 250 | -5.001     | 4.8779     | 6.1354                          | 767.9           | 3.746        | 0.79505            |
| 245 | 250 | -10.001    | 5.8056     | 7.2702                          | 732.5           | 4.253        | 0.79855            |
| 245 | 250 | -15.001    | 7.0121     | 8.7424                          | 691.3           | 4.847        | 0.80207            |
| 245 | 250 | -20.001    | 8.6354     | 10.720                          | 643.5           | 5.557        | 0.80551            |
| 245 | 250 | -25.001    | 10.811     | 13.364                          | 588.6           | 6.363        | 0.80898            |
| 245 | 250 | -30.001    | 13.856     | 17.052                          | 526.8           | 7.299        | 0.81253            |
| 245 | 250 | -35.001    | 18.204     | 22.307                          | 458.8           | 8.351        | 0.81606            |
| 245 | 250 | -40.001    | 25.059     | 30.574                          | 386.2           | 9.677        | 0.81961            |
| 250 | 255 | 60.002     | 1.2022     | 1.6025                          | 957.2           | 1.151        | 0.75020            |
| 250 | 255 | 40.000     | 1.6984     | 2.2215                          | 924.1           | 1.570        | 0.76454            |
| 250 | 255 | 30.000     | 2.0805     | 2.6964                          | 900.6           | 1.874        | 0.77160            |
| 250 | 255 | 24.999     | 2.3252     | 2.9994                          | 886.3           | 2.061        | 0.77520            |
| 250 | 255 | 19.999     | 2.6150     | 3.3578                          | 870.0           | 2.275        | 0.77877            |
| 250 | 255 | 15.000     | 2.9631     | 3.7878                          | 851.4           | 2.523        | 0.78226            |
| 250 | 255 | 9.998      | 3.3835     | 4.3059                          | 830.2           | 2.809        | 0.78578            |
| 250 | 255 | -0.002     | 4.5496     | 5.7388                          | 777.0           | 3.535        | 0.79278            |
| 250 | 255 | -5.003     | 5.4054     | 6.7885                          | 744.1           | 4.022        | 0.79626            |
| 250 | 255 | -10.001    | 6.4755     | 8.0970                          | 705.5           | 4.569        | 0.79974            |
| 250 | 255 | -15.001    | 7.8771     | 9.8067                          | 661.1           | 5.207        | 0.80324            |

| IBP | FBP | Cell Temp. | Dyn. Visc. | Kin. Visc.                      | Shear Rate      | Shear Stress | Density            |
|-----|-----|------------|------------|---------------------------------|-----------------|--------------|--------------------|
| °C  | °C  | °C         | mPa s      | mm <sup>2</sup> s <sup>-1</sup> | s <sup>-1</sup> | Pa           | g cm <sup>-3</sup> |
| 250 | 255 | -20.001    | 9.7770     | 12.120                          | 610.0           | 5.964        | 0.80667            |
| 250 | 255 | -25.002    | 12.347     | 15.240                          | 552.0           | 6.816        | 0.81016            |
| 250 | 255 | -30.001    | 15.980     | 19.639                          | 487.6           | 7.792        | 0.81367            |
| 250 | 255 | -35.002    | 21.214     | 25.960                          | 418.2           | 8.873        | 0.81719            |
| 255 | 260 | 60.001     | 1.2757     | 1.6967                          | 950.1           | 1.212        | 0.75187            |
| 255 | 260 | 39.997     | 1.8142     | 2.3675                          | 914.6           | 1.659        | 0.76629            |
| 255 | 260 | 29.998     | 2.2342     | 2.8885                          | 889.2           | 1.987        | 0.77346            |
| 255 | 260 | 24.998     | 2.5053     | 3.2255                          | 873.5           | 2.189        | 0.77672            |
| 255 | 260 | 20.000     | 2.8270     | 3.6233                          | 856.1           | 2.420        | 0.78025            |
| 255 | 260 | 15.000     | 3.2172     | 4.1050                          | 835.7           | 2.689        | 0.78373            |
| 255 | 260 | 9.999      | 3.6912     | 4.6889                          | 812.5           | 2.999        | 0.78723            |
| 255 | 260 | -0.001     | 5.0167     | 6.3177                          | 754.7           | 3.786        | 0.79407            |
| 255 | 260 | -5.001     | 5.9903     | 7.5098                          | 718.9           | 4.307        | 0.79767            |
| 255 | 260 | -10.001    | 7.2200     | 9.0120                          | 677.6           | 4.892        | 0.80116            |
| 255 | 260 | -15.001    | 8.8489     | 10.998                          | 630.1           | 5.575        | 0.80459            |
| 255 | 260 | -20.001    | 11.066     | 13.695                          | 576.1           | 6.375        | 0.80805            |
| 255 | 260 | -25.000    | 14.085     | 17.356                          | 515.7           | 7.264        | 0.81153            |
| 255 | 260 | -30.002    | 18.405     | 22.583                          | 449.5           | 8.272        | 0.81500            |
| 255 | 260 | -35.001    | 24.717     | 30.198                          | 379.2           | 9.373        | 0.81850            |
| 260 | 265 | 60.002     | 1.3378     | 1.7761                          | 944.2           | 1.263        | 0.75320            |
| 260 | 265 | 40.000     | 1.9186     | 2.5024                          | 906.2           | 1.739        | 0.76672            |
| 260 | 265 | 30.002     | 2.3870     | 3.0830                          | 878.1           | 2.096        | 0.77424            |
| 260 | 265 | 25.001     | 2.6718     | 3.4343                          | 862.2           | 2.304        | 0.77798            |
| 260 | 265 | 19.999     | 3.0192     | 3.8631                          | 843.6           | 2.547        | 0.78156            |
| 260 | 265 | 14.999     | 3.4439     | 4.3868                          | 822.1           | 2.831        | 0.78507            |
| 260 | 265 | 9.999      | 3.9643     | 5.0272                          | 797.4           | 3.161        | 0.78857            |
| 260 | 265 | -0.001     | 5.4217     | 6.8150                          | 736.2           | 3.991        | 0.79555            |
| 260 | 265 | -5.002     | 6.5228     | 8.1889                          | 697.6           | 4.550        | 0.79655            |
| 260 | 265 | -10.001    | 7.9051     | 9.8817                          | 653.9           | 5.169        | 0.79998            |
| 260 | 265 | -15.001    | 9.7415     | 12.124                          | 604.1           | 5.885        | 0.80346            |
| 260 | 265 | -20.001    | 12.270     | 15.207                          | 547.7           | 6.720        | 0.80684            |
| 260 | 265 | -25.001    | 15.731     | 19.413                          | 485.5           | 7.637        | 0.81031            |
| 260 | 265 | -30.001    | 20.716     | 25.455                          | 418.3           | 8.665        | 0.81381            |
| 260 | 265 | -35.001    | 28.041     | 34.307                          | 348.4           | 9.769        | 0.81734            |
| 265 | 270 | 60.001     | 1.4026     | 1.8572                          | 938.1           | 1.316        | 0.75520            |
| 265 | 270 | 39.998     | 2.0250     | 2.6319                          | 897.8           | 1.818        | 0.76942            |
| 265 | 270 | 29.999     | 2.5158     | 3.2403                          | 868.9           | 2.186        | 0.77642            |
| 265 | 270 | 24.999     | 2.8354     | 3.6361                          | 851.2           | 2.414        | 0.77980            |
| 265 | 270 | 19.998     | 3.2181     | 4.1083                          | 831.2           | 2.675        | 0.78332            |
| 265 | 270 | 14.999     | 3.6829     | 4.6810                          | 808.2           | 2.977        | 0.78679            |
| 265 | 270 | 9.999      | 4.2546     | 5.3838                          | 781.9           | 3.327        | 0.79026            |
| 265 | 270 | -0.002     | 5.8666     | 7.3598                          | 717.0           | 4.206        | 0.79712            |
| 265 | 270 | -5.000     | 7.0680     | 8.8280                          | 676.9           | 4.784        | 0.80063            |
| 265 | 270 | -10.001    | 8.6066     | 10.703                          | 631.1           | 5.432        | 0.80409            |
| 265 | 270 | -15.002    | 10.676     | 13.221                          | 578.9           | 6.181        | 0.80750            |
| 265 | 270 | -20.002    | 13.522     | 16.674                          | 520.9           | 7.043        | 0.81094            |
| 265 | 270 | -25.001    | 17.448     | 21.425                          | 457.4           | 7.981        | 0.81441            |

| IBP | FBP | Cell Temp. | Dyn. Visc. | Kin. Visc.                      | Shear Rate      | Shear Stress | Density            |
|-----|-----|------------|------------|---------------------------------|-----------------|--------------|--------------------|
| °C  | °C  | °C         | mPa s      | mm <sup>2</sup> s <sup>-1</sup> | s <sup>-1</sup> | Pa           | g cm <sup>-3</sup> |
| 265 | 270 | -30.002    | 23.146     | 28.300                          | 389.8           | 9.022        | 0.81789            |
| 265 | 270 | -35.001    | 31.541     | 38.400                          | 320.9           | 10.12        | 0.82138            |
| 270 | 275 | 60.000     | 1.4832     | 1.9593                          | 930.7           | 1.380        | 0.75699            |
| 270 | 275 | 40.000     | 2.1534     | 2.7931                          | 887.8           | 1.912        | 0.77098            |
| 270 | 275 | 29.998     | 2.6887     | 3.4561                          | 856.9           | 2.304        | 0.77795            |
| 270 | 275 | 24.998     | 3.0387     | 3.8882                          | 838.0           | 2.547        | 0.78152            |
| 270 | 275 | 20.000     | 3.4599     | 4.4078                          | 816.5           | 2.825        | 0.78494            |
| 270 | 275 | 14.999     | 3.9736     | 5.0397                          | 791.9           | 3.147        | 0.78847            |
| 270 | 275 | 9.999      | 4.6089     | 5.8197                          | 763.8           | 3.520        | 0.79194            |
| 270 | 275 | -0.001     | 6.4118     | 8.0268                          | 694.8           | 4.455        | 0.79879            |
| 270 | 275 | -5.001     | 7.7642     | 9.6781                          | 652.2           | 5.064        | 0.80225            |
| 270 | 275 | -10.001    | 9.5104     | 11.804                          | 604.1           | 5.745        | 0.80572            |
| 270 | 275 | -15.001    | 11.862     | 14.659                          | 549.9           | 6.523        | 0.80918            |
| 270 | 275 | -20.001    | 15.107     | 18.591                          | 490.0           | 7.402        | 0.81256            |
| 270 | 275 | -25.001    | 19.677     | 24.114                          | 425.5           | 8.372        | 0.81601            |
| 270 | 275 | -30.002    | 26.313     | 32.109                          | 358.0           | 9.420        | 0.81947            |
| 275 | 280 | 60.002     | 1.5546     | 2.0490                          | 924.0           | 1.436        | 0.75871            |
| 275 | 280 | 39.999     | 2.2739     | 2.9429                          | 878.7           | 1.998        | 0.77269            |
| 275 | 280 | 29.998     | 2.8512     | 3.6571                          | 845.9           | 2.412        | 0.77963            |
| 275 | 280 | 24.998     | 3.2301     | 4.1243                          | 825.8           | 2.668        | 0.78320            |
| 275 | 280 | 19.999     | 3.6877     | 4.6875                          | 803.2           | 2.962        | 0.78670            |
| 275 | 280 | 15.000     | 4.2478     | 5.3760                          | 777.2           | 3.301        | 0.79015            |
| 275 | 280 | 9.999      | 4.9430     | 6.2286                          | 747.5           | 3.695        | 0.79360            |
| 275 | 280 | -0.001     | 6.9317     | 8.6600                          | 674.7           | 4.677        | 0.80043            |
| 275 | 280 | -5.001     | 8.4302     | 10.487                          | 630.2           | 5.313        | 0.80387            |
| 275 | 280 | -10.001    | 10.378     | 12.854                          | 580.2           | 6.021        | 0.80735            |
| 275 | 280 | -15.001    | 13.014     | 16.051                          | 524.4           | 6.824        | 0.81080            |
| 275 | 280 | -20.000    | 16.675     | 20.480                          | 463.2           | 7.724        | 0.81417            |
| 275 | 280 | -25.001    | 21.866     | 26.744                          | 398.2           | 8.707        | 0.81760            |
| 275 | 280 | -30.001    | 29.443     | 35.859                          | 331.3           | 9.754        | 0.82107            |
| 280 | 285 | 60.000     | 1.6538     | 2.1744                          | 915.2           | 1.514        | 0.76058            |
| 280 | 285 | 39.997     | 2.4453     | 3.1563                          | 866.0           | 2.118        | 0.77472            |
| 280 | 285 | 29.999     | 3.0858     | 3.9474                          | 830.5           | 2.563        | 0.78172            |
| 280 | 285 | 24.999     | 3.5095     | 4.4707                          | 808.8           | 2.839        | 0.78500            |
| 280 | 285 | 19.998     | 4.0226     | 5.1020                          | 784.3           | 3.155        | 0.78843            |
| 280 | 285 | 14.998     | 4.6540     | 5.8767                          | 756.3           | 3.520        | 0.79194            |
| 280 | 285 | 9.999      | 5.4415     | 6.8415                          | 724.3           | 3.941        | 0.79537            |
| 280 | 285 | -0.001     | 7.7142     | 9.6168                          | 646.6           | 4.988        | 0.80215            |
| 280 | 285 | -5.001     | 9.4385     | 11.716                          | 599.6           | 5.659        | 0.80562            |
| 280 | 285 | -10.001    | 11.699     | 14.459                          | 547.2           | 6.401        | 0.80907            |
| 280 | 285 | -15.001    | 14.788     | 18.202                          | 489.3           | 7.236        | 0.81244            |
| 280 | 285 | -20.001    | 19.095     | 23.405                          | 427.1           | 8.156        | 0.81585            |
| 280 | 285 | -25.001    | 25.259     | 30.831                          | 362.2           | 9.148        | 0.81928            |
| 280 | 285 | -30.000    | 58.313     | 70.907                          | 196.2           | 11.44        | 0.82238            |
| 285 | 290 | 60.003     | 1.7519     | 2.2982                          | 906.6           | 1.588        | 0.76228            |
| 285 | 290 | 39.998     | 2.6056     | 3.3571                          | 854.4           | 2.226        | 0.77615            |
| 285 | 290 | 29.999     | 3.3070     | 4.2233                          | 816.6           | 2.700        | 0.78304            |

| IBP | FBP | Cell Temp. | Dyn. Visc. | Kin. Visc.                      | Shear Rate      | Shear Stress | Density            |
|-----|-----|------------|------------|---------------------------------|-----------------|--------------|--------------------|
| °C  | °C  | °C         | mPa s      | mm <sup>2</sup> s <sup>-1</sup> | s <sup>-1</sup> | Pa           | g cm <sup>-3</sup> |
| 285 | 290 | 25.000     | 3.7720     | 4.7954                          | 793.5           | 2.993        | 0.78658            |
| 285 | 290 | 20.000     | 4.3374     | 5.4905                          | 767.3           | 3.328        | 0.78998            |
| 285 | 290 | 15.000     | 5.0358     | 6.3469                          | 737.7           | 3.715        | 0.79343            |
| 285 | 290 | 10.000     | 5.9113     | 7.4177                          | 703.9           | 4.161        | 0.79691            |
| 285 | 290 | -0.001     | 8.4567     | 10.523                          | 622.0           | 5.260        | 0.80366            |
| 285 | 290 | -5.002     | 10.401     | 12.887                          | 573.0           | 5.960        | 0.80711            |
| 285 | 290 | -10.001    | 12.965     | 15.995                          | 518.9           | 6.727        | 0.81057            |
| 285 | 290 | -15.000    | 16.491     | 20.261                          | 459.8           | 7.583        | 0.81394            |
| 285 | 290 | -20.000    | 21.495     | 26.299                          | 397.2           | 8.537        | 0.81733            |
| 285 | 290 | -25.000    | 28.567     | 34.806                          | 332.8           | 9.507        | 0.82075            |
| 290 | 295 | 60.001     | 1.8600     | 2.4340                          | 897.2           | 1.669        | 0.76417            |
| 290 | 295 | 40.000     | 2.7980     | 3.5960                          | 841.0           | 2.353        | 0.77810            |
| 290 | 295 | 29.999     | 3.5712     | 4.5485                          | 800.4           | 2.858        | 0.78514            |
| 290 | 295 | 25.000     | 4.0880     | 5.1852                          | 775.6           | 3.171        | 0.78839            |
| 290 | 295 | 20.000     | 4.7192     | 5.9601                          | 747.8           | 3.529        | 0.79180            |
| 290 | 295 | 15.000     | 5.5032     | 6.9208                          | 716.0           | 3.940        | 0.79517            |
| 290 | 295 | 9.999      | 6.4901     | 8.1261                          | 680.0           | 4.414        | 0.79866            |
| 290 | 295 | -0.002     | 9.3828     | 11.650                          | 593.8           | 5.572        | 0.80539            |
| 290 | 295 | -5.001     | 11.609     | 14.352                          | 542.8           | 6.301        | 0.80885            |
| 290 | 295 | -10.000    | 14.567     | 17.934                          | 487.0           | 7.094        | 0.81228            |
| 290 | 295 | -15.001    | 18.669     | 22.890                          | 426.9           | 7.969        | 0.81562            |
| 290 | 295 | -20.001    | 24.522     | 29.941                          | 364.2           | 8.932        | 0.81902            |
| 290 | 295 | -25.001    | 32.867     | 39.963                          | 301.1           | 9.895        | 0.82243            |
| 295 | 300 | 60.001     | 1.9722     | 2.5758                          | 887.8           | 1.751        | 0.76567            |
| 295 | 300 | 39.999     | 2.9929     | 3.8402                          | 827.7           | 2.477        | 0.77936            |
| 295 | 300 | 29.999     | 3.8403     | 4.8846                          | 784.6           | 3.013        | 0.78621            |
| 295 | 300 | 24.999     | 4.4094     | 5.5834                          | 758.4           | 3.344        | 0.78974            |
| 295 | 300 | 20.000     | 5.1067     | 6.4387                          | 728.8           | 3.722        | 0.79311            |
| 295 | 300 | 15.000     | 5.9732     | 7.4992                          | 695.7           | 4.155        | 0.79652            |
| 295 | 300 | 9.999      | 7.0772     | 8.8473                          | 657.5           | 4.653        | 0.79993            |
| 295 | 300 | -0.001     | 10.330     | 12.806                          | 567.5           | 5.862        | 0.80669            |
| 295 | 300 | -5.000     | 12.870     | 15.891                          | 514.4           | 6.621        | 0.80991            |
| 295 | 300 | -10.000    | 16.238     | 19.959                          | 457.6           | 7.431        | 0.81353            |
| 295 | 300 | -15.001    | 20.928     | 25.619                          | 397.3           | 8.315        | 0.81691            |
| 295 | 300 | -20.001    | 27.676     | 33.740                          | 335.3           | 9.279        | 0.82028            |
| 300 | 305 | 60.000     | 2.0597     | 2.6848                          | 880.5           | 1.814        | 0.76717            |
| 300 | 305 | 39.998     | 3.1510     | 4.0355                          | 817.3           | 2.575        | 0.78083            |
| 300 | 305 | 29.999     | 4.0626     | 5.1579                          | 772.0           | 3.136        | 0.78766            |
| 300 | 305 | 24.999     | 4.6766     | 5.9110                          | 744.5           | 3.482        | 0.79117            |
| 300 | 305 | 20.000     | 5.4320     | 6.8366                          | 713.6           | 3.877        | 0.79454            |
| 300 | 305 | 14.999     | 6.3771     | 7.9920                          | 678.7           | 4.328        | 0.79793            |
| 300 | 305 | 10.000     | 7.5756     | 9.4537                          | 639.5           | 4.844        | 0.80134            |
| 300 | 305 | -0.002     | 11.149     | 13.796                          | 546.5           | 6.093        | 0.80807            |
| 300 | 305 | -5.001     | 13.927     | 17.162                          | 492.8           | 6.863        | 0.81152            |
| 300 | 305 | -10.001    | 17.664     | 21.675                          | 435.2           | 7.688        | 0.81494            |
| 300 | 305 | -15.001    | 22.897     | 27.982                          | 374.7           | 8.579        | 0.81827            |
| 300 | 305 | -20.001    | 30.436     | 37.042                          | 313.5           | 9.540        | 0.82167            |

| IBP | FBP | Cell Temp. | Dyn. Visc. | Kin. Visc.                      | Shear Rate      | Shear Stress | Density            |
|-----|-----|------------|------------|---------------------------------|-----------------|--------------|--------------------|
| °C  | °C  | °C         | mPa s      | mm <sup>2</sup> s <sup>-1</sup> | s <sup>-1</sup> | Pa           | g cm <sup>-3</sup> |
| 305 | 310 | 60.002     | 2.1790     | 2.8383                          | 870.8           | 1.898        | 0.76772            |
| 305 | 310 | 39.999     | 3.3475     | 4.2838                          | 804.7           | 2.694        | 0.78143            |
| 305 | 310 | 29.998     | 4.3368     | 5.5020                          | 757.1           | 3.283        | 0.78824            |
| 305 | 310 | 24.999     | 5.0066     | 6.3234                          | 728.2           | 3.646        | 0.79175            |
| 305 | 310 | 20.000     | 5.8338     | 7.3371                          | 695.8           | 4.059        | 0.79511            |
| 305 | 310 | 15.000     | 6.8728     | 8.6072                          | 659.3           | 4.531        | 0.79849            |
| 305 | 310 | 9.998      | 8.1970     | 10.222                          | 618.3           | 5.069        | 0.80189            |
| 305 | 310 | -0.002     | 12.164     | 15.044                          | 522.5           | 6.356        | 0.80857            |
| 305 | 310 | -5.001     | 15.267     | 18.802                          | 467.9           | 7.144        | 0.81202            |
| 305 | 310 | -10.001    | 19.474     | 23.885                          | 409.8           | 7.980        | 0.81530            |
| 305 | 310 | -15.002    | 25.380     | 30.998                          | 349.6           | 8.873        | 0.81876            |
| 310 | 315 | 60.002     | 2.3570     | 3.0643                          | 856.7           | 2.019        | 0.76918            |
| 310 | 315 | 39.998     | 3.6727     | 4.6916                          | 784.8           | 2.882        | 0.78282            |
| 310 | 315 | 29.999     | 4.8017     | 6.0808                          | 733.0           | 3.520        | 0.78964            |
| 310 | 315 | 24.999     | 5.5665     | 7.0197                          | 702.1           | 3.908        | 0.79299            |
| 310 | 315 | 19.999     | 6.5184     | 8.1855                          | 667.3           | 4.350        | 0.79633            |
| 310 | 315 | 14.999     | 7.7178     | 9.6508                          | 628.7           | 4.852        | 0.79970            |
| 310 | 315 | 9.998      | 9.2618     | 11.533                          | 585.2           | 5.420        | 0.80307            |
| 310 | 315 | -0.001     | 13.938     | 17.214                          | 485.3           | 6.765        | 0.80972            |
| 310 | 315 | -5.001     | 17.625     | 21.675                          | 429.6           | 7.573        | 0.81317            |
| 310 | 315 | -10.000    | 22.663     | 27.760                          | 371.4           | 8.418        | 0.81642            |
| 310 | 315 | -15.000    | 29.782     | 36.324                          | 312.5           | 9.306        | 0.81988            |
| 315 | 320 | 60.000     | 2.4999     | 3.2439                          | 845.8           | 2.114        | 0.77065            |
| 315 | 320 | 39.999     | 3.9376     | 5.0210                          | 769.1           | 3.029        | 0.78423            |
| 315 | 320 | 29.999     | 5.1768     | 6.5447                          | 714.6           | 3.699        | 0.79099            |
| 315 | 320 | 24.998     | 6.0248     | 7.5845                          | 681.9           | 4.109        | 0.79435            |
| 315 | 320 | 19.999     | 7.0836     | 8.8802                          | 645.5           | 4.572        | 0.79769            |
| 315 | 320 | 14.999     | 8.4261     | 10.519                          | 604.9           | 5.097        | 0.80105            |
| 315 | 320 | 9.999      | 10.155     | 12.624                          | 560.0           | 5.687        | 0.80442            |
| 315 | 320 | -0.002     | 15.435     | 19.031                          | 457.8           | 7.066        | 0.81101            |
| 315 | 320 | -5.001     | 19.639     | 24.117                          | 401.6           | 7.887        | 0.81433            |
| 315 | 320 | -10.001    | 25.404     | 31.064                          | 343.8           | 8.733        | 0.81779            |
| 315 | 320 | -15.001    | 44.777     | 54.553                          | 229.4           | 10.27        | 0.82081            |
| 320 | 325 | 60.000     | 2.7743     | 3.5921                          | 825.4           | 2.290        | 0.77234            |
| 320 | 325 | 39.999     | 4.4427     | 5.6542                          | 741.1           | 3.292        | 0.78572            |
| 320 | 325 | 30.000     | 5.9037     | 7.4499                          | 681.5           | 4.024        | 0.79246            |
| 320 | 325 | 24.999     | 6.9123     | 8.6859                          | 646.1           | 4.466        | 0.79581            |
| 320 | 325 | 19.999     | 8.1800     | 10.236                          | 606.9           | 4.964        | 0.79912            |
| 320 | 325 | 14.999     | 9.7997     | 12.212                          | 563.6           | 5.524        | 0.80245            |
| 320 | 325 | 9.999      | 11.901     | 14.769                          | 516.4           | 6.146        | 0.80581            |
| 320 | 325 | -0.001     | 18.397     | 22.646                          | 411.5           | 7.571        | 0.81236            |
| 320 | 325 | -5.001     | 23.635     | 28.973                          | 355.5           | 8.402        | 0.81577            |
| 320 | 325 | -10.002    | 30.888     | 37.710                          | 299.2           | 9.242        | 0.81910            |

### 3. Aromatics Volume Fractions of Petroleum-based Kerosene Cuts

The volume fraction of aromatics in petroleum-based kerosene cuts determined according to ASTM D6379 are shown in Figure S2. Analyses were carried out as duplicates for selected samples. The deviation between repetitions was well within the estimated repeatability in ASTM D6379.

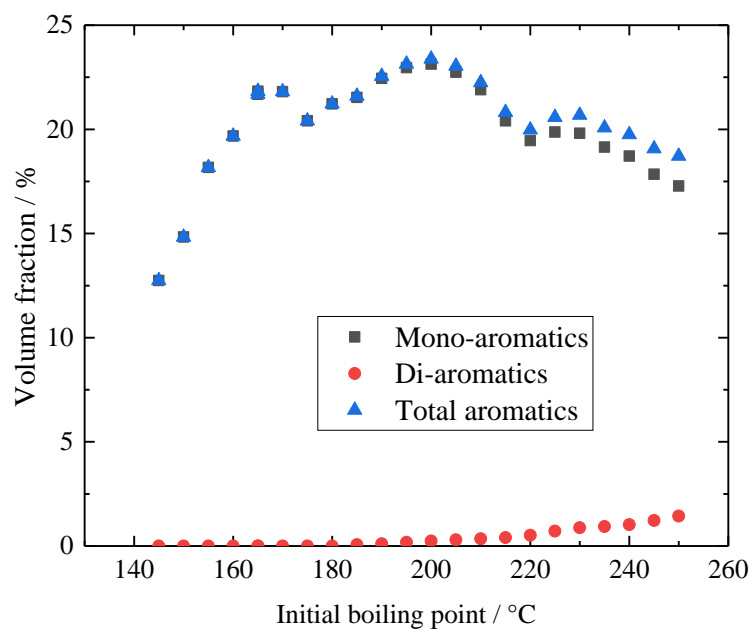

Figure S2 – Aromatics volume fraction petroleum-based kerosene cuts as a function of the initial boiling point. The final boiling point is 5 °C above the initial boiling point.



#### 4. Parameters of MacCoull's Equation for Viscosity-temperature Dependence

The parameters of MacCoull's equation as well as the estimates for low-temperature viscosity are shown in Table S9 for the petroleum-based kerosene cuts and Table S10 for the synthetic distillate cuts.

Table S9 – Petroleum-derived kerosene cuts: Parameters A and B of MacCoull's equation determined using viscosity data above -20 °C. Estimates for the viscosity at -40 °C using MacCoull's equation with the shown parameters and relative difference to experimentally determined viscosity at these temperatures (see Table S1). Positive relative differences indicate that the calculated viscosity is higher than the measured viscosity and vice versa.

| IBP<br>°C | A<br>- | B<br>- | Estimated<br>kinematic<br>viscosity<br>at -40 °C<br><br>mm <sup>2</sup> s <sup>-1</sup> | Relative<br>difference<br>viscosity<br>estimate and<br>experiment<br>at -40 °C<br>% |
|-----------|--------|--------|-----------------------------------------------------------------------------------------|-------------------------------------------------------------------------------------|
| 140       | 9.441  | 4.088  | 3.100                                                                                   | 4.6                                                                                 |
| 145       | 9.486  | 4.110  | 3.028                                                                                   | 2.6                                                                                 |
| 150       | 9.648  | 4.168  | 3.298                                                                                   | 3.4                                                                                 |
| 155       | 9.357  | 4.037  | 3.575                                                                                   | 0.1                                                                                 |
| 160       | 9.912  | 4.260  | 4.009                                                                                   | 4.2                                                                                 |
| 165       | 9.881  | 4.239  | 4.329                                                                                   | 4.0                                                                                 |
| 170       | 9.454  | 4.049  | 4.796                                                                                   | 1.4                                                                                 |
| 175       | 9.529  | 4.069  | 5.444                                                                                   | -4.1                                                                                |
| 180       | 9.499  | 4.047  | 6.011                                                                                   | 0.9                                                                                 |
| 185       | 9.491  | 4.035  | 6.653                                                                                   | 0.5                                                                                 |
| 190       | 8.785  | 3.727  | 7.512                                                                                   | -5.8                                                                                |
| 195       | 9.569  | 4.047  | 8.763                                                                                   | 0.2                                                                                 |
| 200       | 9.606  | 4.052  | 9.977                                                                                   | -0.4                                                                                |
| 205       | 9.615  | 4.049  | 11.085                                                                                  | -0.6                                                                                |
| 210       | 9.612  | 4.040  | 12.352                                                                                  | -2.5                                                                                |
| 215       | 9.681  | 4.059  | 14.503                                                                                  | -2.8                                                                                |
| 220       | 9.702  | 4.059  | 16.613                                                                                  | -3.9                                                                                |
| 225       | 9.741  | 4.066  | 19.363                                                                                  | -5.0                                                                                |
| 230       | 9.747  | 4.057  | 23.670                                                                                  | -6.6                                                                                |
| 235       | 9.823  | 4.082  | 26.956                                                                                  | -6.6                                                                                |
| 240       | 9.860  | 4.089  | a)                                                                                      | b)                                                                                  |
| 245       | 9.899  | 4.096  | a)                                                                                      | b)                                                                                  |
| 250       | 9.960  | 4.113  | a)                                                                                      | b)                                                                                  |

- a) Not estimated because sample freezes above the indicated temperature  
b) No exp. data available as sample freezes above the indicated temperature

Table S10 – Synthetic distillate cuts: Parameters A and B of MacCoull’s equation determined using viscosity data above -20 °C. Estimates for the viscosity at -40 and -60 °C using MacCoull’s equation with the shown parameters and relative difference to experimentally determined viscosity at these temperatures (see Table S2). Positive relative differences indicate that the calculated viscosity is higher than the measured viscosity and vice versa.

| IBP<br>°C | A<br>- | B<br>- | Estimated<br>kinematic<br>viscosity at<br>-40 °C<br>mm <sup>2</sup> s <sup>-1</sup> | Relative<br>difference<br>viscosity<br>estimate and<br>experiment<br>at -40 °C<br>% |
|-----------|--------|--------|-------------------------------------------------------------------------------------|-------------------------------------------------------------------------------------|
| 140       | 9.330  | 4.047  | 2.933                                                                               | 3.4                                                                                 |
| 145       | 9.447  | 4.089  | 3.138                                                                               | 3.2                                                                                 |
| 150       | 8.712  | 3.779  | 3.142                                                                               | -4.9                                                                                |
| 155       | 9.109  | 3.927  | 3.753                                                                               | -1.1                                                                                |
| 160       | 9.473  | 4.071  | 4.141                                                                               | 1.5                                                                                 |
| 165       | 9.467  | 4.061  | 4.458                                                                               | 1.3                                                                                 |
| 170       | 9.506  | 4.068  | 4.946                                                                               | 1.6                                                                                 |
| 175       | 9.516  | 4.058  | 5.744                                                                               | 1.1                                                                                 |
| 180       | 9.558  | 4.069  | 6.241                                                                               | 1.2                                                                                 |
| 185       | 9.617  | 4.085  | 6.945                                                                               | 1.5                                                                                 |
| 190       | 9.593  | 4.067  | 7.658                                                                               | 0.6                                                                                 |
| 195       | 9.605  | 4.064  | 8.523                                                                               | 0.2                                                                                 |
| 200       | 9.490  | 4.004  | 9.928                                                                               | 0.0                                                                                 |
| 205       | 9.610  | 4.054  | 10.031                                                                              | -1.1                                                                                |
| 210       | 9.543  | 4.016  | 11.494                                                                              | a)                                                                                  |
| 215       | 9.693  | 4.073  | 12.681                                                                              | -2.3                                                                                |
| 220       | 9.711  | 4.072  | 14.341                                                                              | -3.1                                                                                |
| 225       | 9.720  | 4.068  | 16.273                                                                              | -3.8                                                                                |
| 230       | 9.751  | 4.071  | 19.109                                                                              | -4.2                                                                                |
| 235       | 9.772  | 4.072  | 21.865                                                                              | -4.4                                                                                |
| 240       | 9.783  | 4.068  | 25.438                                                                              | -5.0                                                                                |
| 245       | 9.796  | 4.067  | 29.101                                                                              | -5.1                                                                                |
| 250       | 9.803  | 4.061  | b)                                                                                  | c)                                                                                  |
| 255       | 9.816  | 4.059  | b)                                                                                  | c)                                                                                  |
| 260       | 9.822  | 4.055  | b)                                                                                  | c)                                                                                  |
| 265       | 9.814  | 4.046  | b)                                                                                  | c)                                                                                  |
| 270       | 9.800  | 4.033  | b)                                                                                  | c)                                                                                  |
| 275       | 9.794  | 4.025  | b)                                                                                  | c)                                                                                  |
| 280       | 9.798  | 4.019  | b)                                                                                  | c)                                                                                  |
| 285       | 9.779  | 4.005  | b)                                                                                  | c)                                                                                  |
| 290       | 9.777  | 3.997  | b)                                                                                  | c)                                                                                  |
| 295       | 9.756  | 3.982  | b)                                                                                  | c)                                                                                  |
| 300       | 9.750  | 3.975  | b)                                                                                  | c)                                                                                  |
| 305       | 10.070 | 4.099  | b)                                                                                  | c)                                                                                  |
| 310       | 10.128 | 4.114  | b)                                                                                  | c)                                                                                  |
| 315       | 9.996  | 4.055  | b)                                                                                  | c)                                                                                  |
| 320       | 10.215 | 4.133  | b)                                                                                  | c)                                                                                  |

- a) No exp. data available due to instrument error during determination
- b) Not estimated because sample freezes above the indicated temperature
- c) No exp. data available as sample freezes above the indicated temperature

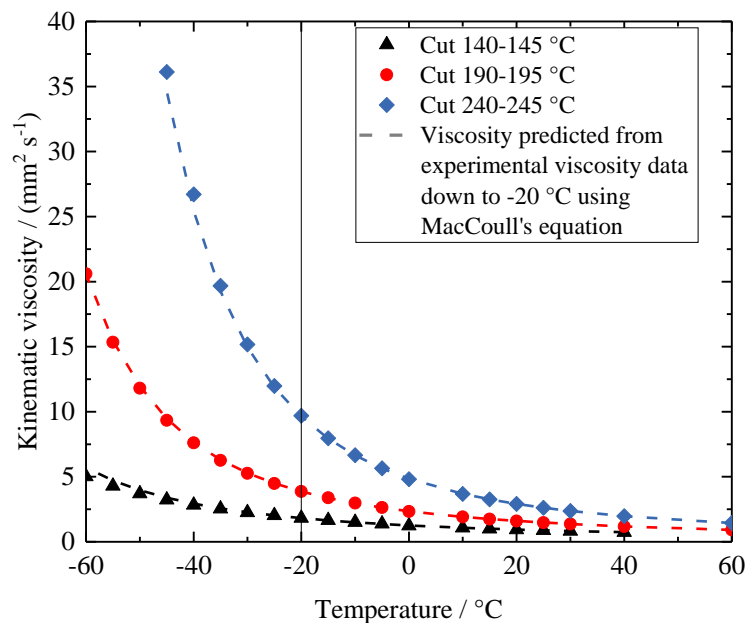

Figure S3 – Kinematic viscosity of three synthetic distillate cuts as a function of the temperature and predicted viscosity from MacCoull's equation using experimental data down to -20 °C to determine the parameters A and B. The parameters are listed in Table S7. Below a temperature of -20 °C (marked by vertical line), the predicted viscosity from MacCoull's equation is an extrapolation.

## References

- [1] Link, F.; Halmenschlager, C. M.; Chauhan, G.; De Klerk, A. Wax Hydrocracking over Pt/SiO<sub>2</sub>-Al<sub>2</sub>O<sub>3</sub> at 2 MPa: Product Characterization and Its Implications for Catalysis. *Energy Fuels* **2021**, *35*, 5252–5263
- [2] Le Fèvre, R. J. W. Molecular refractivity and polarizability. *Adv. Phys. Org. Chem.* **1965**, *3*, 1-90.
- [3] Kurtz, S. S. Jr. Physical properties and hydrocarbon structure. In *The chemistry of petroleum hydrocarbons. Vol. 1*; Brooks, B. T., Boord, C. E., Kurtz, S. S. Jr., Schmerling, L. Eds.; Reinhold: New York, 1954, pp 275–331.
- [4] Riazi, M. R. *Characterization and Properties of Petroleum Fractions* (ASTM manual series: MNL50); ASTM International: West Conshohocken, 2005, pp 30–151.
